1  
2  
3  
4  
5  
6  
7  
8  
9  
10  
11  
12

## TCR-pMHC bond length controls TCR ligand discrimination

Dibyendu K. Sasmal<sup>1</sup>, Wei Feng<sup>1</sup>, Sobhan Roy<sup>2</sup>, Peter Leung<sup>1</sup>, Yanran He<sup>3</sup>, Chufan Cai<sup>1</sup>,  
Guoshuai Cao<sup>1</sup>, Huada Lian<sup>4</sup>, Jian Qin<sup>5</sup>, Enfu Hui<sup>6</sup>, Hans Schreiber<sup>3</sup>, Erin Adams<sup>2</sup>, Jun Huang\*<sup>1</sup>

<sup>1</sup>Institute for Molecular Engineering, The University of Chicago, USA

<sup>2</sup>Department of Biochemistry and Molecular Biology, The University of Chicago, USA

<sup>3</sup>Department of Pathology, The University of Chicago, USA

<sup>4-5</sup>Department of Materials Science & Engineering, Department of Chemical Engineering,  
Stanford University, USA

<sup>6</sup>Section of Cell & Developmental Biology, Division of Biological Sciences, University of  
California, San Diego, USA

\* Email: [huangjun@uchicago.edu](mailto:huangjun@uchicago.edu)

1 **T-cell receptors (TCRs) detect specifically and sensitively a small number of agonist peptide-**  
2 **major histocompatibility complexes (pMHCs) from an ocean of structurally similar self-**  
3 **pMHCs to trigger antigen-specific adaptive immune responses<sup>1-4</sup>. Despite intense efforts, the**  
4 **mechanism underlying TCR ligand discrimination remains a major unanswered question in**  
5 **immunology. Here we show that a TCR discriminates between closely related peptides by**  
6 **forming TCR-pMHC bonds with different lengths, which precisely control the accessibility**  
7 **of CD3 $\zeta$  immunoreceptor tyrosine-based activation motifs (ITAMs) for phosphorylation.**  
8 **Using *in situ* fluorescence resonance energy transfer (FRET)<sup>3,5</sup>, we measured the**  
9 **intermolecular length of single TCR-pMHC bonds and the intramolecular distance of**  
10 **individual TCR-CD3 $\zeta$  complexes at the membrane of live primary T cells. We found that an**  
11 **agonist forms a short TCR-pMHC bond to pull the otherwise sequestered CD3 $\zeta$  off the inner**  
12 **leaflet of the plasma membrane, leading to full exposure of its ITAMs for strong**  
13 **phosphorylation. By contrast, a structurally similar weaker peptide forms a longer bond**  
14 **with the TCR, resulting in partial dissociation of CD3 $\zeta$  from the membrane and weak**  
15 **phosphorylation. Furthermore, we found that TCR-pMHC bond length determines 2D TCR**  
16 **binding kinetics and affinity, T-cell calcium signaling and T-cell proliferation, governing the**  
17 **entire process of signal reception, transduction and regulation. Thus, our data reveal the**  
18 **fundamental mechanism by which a TCR deciphers the structural differences between**  
19 **foreign antigens and self-peptides via TCR-pMHC bond length to initiate different TCR**  
20 **signaling for ligand discrimination.**

21 It remains elusive how a TCR deciphers the structural differences among peptides and  
22 properly propagates surface recognition signals across the cell plasma membrane to CD3  
23 intracellular ITAM domains to induce distinct T-cell signaling. The TCR conformational change

1 model postulates a conformational change in a TCR upon pMHC binding, but no conformational  
2 changes at the binding interface have been identified that are conserved in TCR-pMHC crystal  
3 structures<sup>6,7</sup>. However, crystal structures only provide a “snapshot” of the thermodynamically  
4 stable conformation of purified TCR and pMHC proteins. To carefully examine possible TCR  
5 conformational changes and critically probe the mechanisms of TCR ligand discrimination *in situ*,  
6 we used FRET<sup>5,8</sup>, a spectroscopic ruler with subnanometer precision, to measure the  
7 intermolecular length of a TCR-pMHC bond and the intramolecular distance of a TCR-CD3 $\zeta$   
8 complex at the immunological synapse of a live primary 5C.C7 transgenic CD4<sup>+</sup> T cell in real time  
9 with a temporal resolution of ~10 ms.

10 To measure the intermolecular length of a single TCR-pMHC bond, a TCR and a pMHC were  
11 site-specifically labeled with a FRET acceptor Cy5 and a FRET donor Cy3, respectively<sup>3</sup>. Because  
12 the TCR was labeled via an anti-TCR single-chain variable fragment (scFv) J1 (Fig. 1a and  
13 Extended Data Fig. 1), the distance between the Cy3 and the Cy5 is a pseudo TCR-pMHC bond  
14 length. Yet, it nevertheless provides a reasonable approximation of the length of a single TCR-  
15 pMHC bond. The intermolecular length of a single TCR-pMHC bond on the cell surface was  
16 measured by Cy3/Cy5 FRET (FRET1) in real-time (Fig. 1a). To measure the intramolecular  
17 distance between the TCR and the CD3 $\zeta$  in a transmembrane TCR-CD3 $\zeta$  complex, we inserted a  
18 green fluorescent protein (GFP) to the C-terminus of the CD3 $\zeta$  chain, and the TCR was labeled  
19 with an Alexa568 fluorophore using a different anti-TCR scFv J3 with a unique labeling site close  
20 to the cell membrane<sup>3</sup>. The real-time intramolecular distances of TCR-CD3 $\zeta$  complexes were  
21 measured by GFP/Alexa568 FRET (FRET2) using time-lapse microscopy (Fig. 1a and Extended  
22 Data Fig. 2a). We first performed experiments to assess the feasibility and specificity of the cell  
23 surface FRET1 and transmembrane FRET2 on lipid bilayer and glass surface containing pMHCs

1 and accessory molecules ICAM-1 and B7-1, respectively (Fig. 1b-e, Extended Data Fig. 2a and 3-  
2 4, Supplementary Movie 1-3). For cell surface FRET1, we readily detected FRET signals for three  
3 agonist pMHCs but not for a null pMHC on lipid bilayer and glass surface, and the FRET  
4 efficiencies ( $E_{\text{FRET}}$ ) were positively correlated with the pMHC potencies in activating T cells<sup>9</sup>. The  
5 average synaptic  $E_{\text{FRET1}}$  was 0.79, 0.54 and 0.29 for the super agonist K5, agonist MCC and weak  
6 agonist 102S, respectively (Fig. 1d). However, no synaptic FRET was found for the null pMHC  
7 (Fig. 1b and d). These data validated the specificity of our cell surface TCR-pMHC FRET and  
8 were consistent with a previous report<sup>3</sup>. In contrast, the transmembrane TCR-CD3 $\zeta$  FRET  
9 efficiencies were inversely correlated with the pMHC potencies with the highest FRET observed  
10 for the null ligand (Fig. 1c and e). In the presence of agonist pMHCs K5, MCC and 102S, the  
11 transmembrane FRET was only detected at the TCR-CD3 $\zeta$  co-localized microclusters but not  
12 outside of the co-localized microclusters (Fig. 1c and Extended Data Fig. 5a). Replacing the FRET  
13 acceptor Alexa568 with a Cy5 dye abolished the transmembrane FRET (Extended Data Fig. 5b).  
14 These experiments confirmed the specificity of the transmembrane TCR-CD3 $\zeta$  FRET as well.

15 We next performed Cy3/Cy5 single-molecule FRET (smFRET) on the lipid bilayer to  
16 measure the lengths of single TCR-pMHC bonds using total internal reflection fluorescence  
17 (TIRF) microscopy (Fig. 2, Extended Data Fig. 2a and Supplementary Movie 4). TCR-pMHC bond  
18 formation at the live T-cell membrane brought the donor Cy3 and the acceptor Cy5 into close  
19 proximity to enable smFRET (Fig. 1a and 2a). The fluorescent intensities of Cy3 and Cy5 were  
20 real-time recorded with a rate of ~100-200 frames/s (Fig. 2b, top panel and Extended Data Fig.  
21 6a), and the  $E_{\text{FRET}}$  values were calculated based on the intensities of the donor Cy3 and the acceptor  
22 Cy5 (Methods and Fig. 2b, bottom panel). As  $E_{\text{FRET}}$  is inversely proportional to the sixth power of  
23 the distance between the donor and the acceptor, the Cy3/Cy5 smFRET serves as a sensitive

1 microscopic ruler to precisely measure the TCR-pMHC bond length in real-time. The time  
2 trajectory of  $E_{\text{FRET}}$  showed that a TCR-pMHC bond is dynamic and displays a range of continuous  
3 conformations (Fig. 2b), aligned with a recent report that a TCR undergoes conformational  
4 changes upon ligation<sup>10</sup>. Recording the conformational fluctuation trajectories provided a real-time  
5 observation of single TCR-pMHC bond dynamics. By plotting the  $E_{\text{FRET}}$  histogram and fitting it  
6 with a Gaussian function, we identified the most probable  $E_{\text{FRET}}$  value of 0.7, corresponding to a  
7 47 Å distance between the 5C.C7 TCR and the super agonist K5 pMHC in a representative  
8 smFRET trajectory (Fig. 2c). We repeated our single-bond measurements for K5 pMHC and also  
9 performed similar smFRET experiments for agonist MCC and weak agonist 102S pMHCs  
10 (Extended Data Fig. 7). After collecting many individual smFRET trajectories for each pMHC, we  
11 pooled all  $E_{\text{FRET}}$  data together and plotted the histograms for each pMHC ( $\geq 8,000$ -28,000 events  
12 from 1,300-1,800 trajectories per histogram, Fig. 2d). Remarkably, the distributions of  $E_{\text{FRET}}$   
13 showed that the pseudo TCR-pMHC bond lengths were peptide dependent, and single TCR-pMHC  
14 bonds were highly dynamic with a range of continuous conformational states. Fitting each  
15 histogram with a Gaussian function (curves, Fig. 2d) yielded the most probable bond length for  
16 each pMHC: 44 Å for K5 (super agonist), 57 Å for MCC (agonist), and 68 Å for 102S (weak  
17 agonist) (Fig. 2d), directly revealing angstrom-level, ligation-induced, peptide-dependent TCR-  
18 pMHC bond lengths and conformational dynamics *in situ*. This key information has been missing  
19 from previously reported TCR-pMHC crystal structures<sup>7,11</sup>. We further measured the average  
20 pseudo TCR-pMHC bond lengths using ensemble FRET (Extended Data Fig. 8) on both a lipid  
21 bilayer (Fig. 1a) and a glass surface (Extended Data Fig. 1), confirming our single bond  
22 measurements obtained using smFRET (Fig. 2d). We then quantified the binding strength of each  
23 single TCR-pMHC bond by analyzing the potential-of-mean-force (PMF)<sup>12</sup>, which measures the

1 free energy cost of variation in bond length. PMF minimizes at equilibrium, and its curvature  
2 governs the size of fluctuation (Fig. 2e). Clearly, super agonist K5 and agonist MCC have deep  
3 and narrow energy wells, indicating strong and stable bonds. In contrast, the weak agonist 102S  
4 has a shallow and wide energy well, suggesting weak bond strength and unstable binding state.  
5 Overall, the depth and width of the PMF revealed that K5 and MCC form more stable (shorter)  
6 bonds with TCRs compared to that of 102S (Fig. 2e), consistent with previous reports that K5 and  
7 MCC have higher 3D *in vitro* binding affinities with TCRs than that of 102S<sup>3,9</sup> as well as that TCR  
8 triggering is dependent on receptor-ligand complex dimensions<sup>13,14</sup>. Our measurements not only  
9 discovered that TCR triggering is critically dependent on the length of a TCR-pMHC bond but  
10 also linked bond length to bond energy, thus providing fundamental knowledge for understanding  
11 TCR discrimination and signaling.

12 It is not clear how CD3 $\zeta$  dissociates from the membrane to initiate T-cell intracellular  
13 signaling. To further understand how surface TCR-pMHC bonds propagate extracellular  
14 recognition signals to intracellular CD3 $\zeta$  ITAMs across the cell membrane, we developed a  
15 transmembrane FRET assay to measure the conformational change between the extracellular TCR  
16 domain and intracellular CD3 $\zeta$  chain of the same molecular complex (Fig. 1a and Extended Data  
17 Fig. 1). Upon the addition of 5C.C7 transgenic T cells with Alexa568-labeled TCRs and GFP-  
18 tagged CD3 $\zeta$  to the lipid bilayer or glass surface containing pMHC ligands, we observed rapid  
19 microcluster formation and instant onset of transmembrane FRET between TCRs and CD3 $\zeta$ . TCRs  
20 were found colocalized with CD3 $\zeta$  in plasma membrane microclusters [Pearson correlation  
21 coefficient (PCC)<sup>15</sup>,  $0.93 \pm 0.07$  for lipid bilayer and  $0.59 \pm 0.19$  for glass surface] (Fig. 3a-b,  
22 Extended Data Fig. 6b and 9-10, Supplementary Movie 5-7), highlighting the initiation of T-cell  
23 signaling at the segregated TCR-pMHC bond-mediated close contacts<sup>16</sup>. The high degree of TCR-

1 CD3 $\zeta$  colocalization suggested obligate assembly of TCR-CD3 $\zeta$  for effective T-cell signaling and  
2 verified the specificity of our transmembrane TCR-CD3 $\zeta$  FRET. On the lipid bilayer, TCRs and  
3 CD3 $\zeta$  quickly formed relatively large microclusters, which continuously moved from the  
4 periphery to the center of the cell and formed the immunological synapse (Fig. 3a). On the glass  
5 surface, TCRs and CD3 $\zeta$  formed smaller microclusters, the size of which increased slightly over  
6 time. These microclusters remained at the original sites without forming a synapse (Fig. 3b),  
7 consistent with a previous observation in the patterned grids<sup>17</sup>. We then tracked single  
8 microclusters and measured their FRET efficiencies individually on both the lipid bilayer and glass  
9 surface in real-time. After converting the FRET efficiencies to distances between a TCR and a  
10 CD3 $\zeta$ , we plotted three-dimensional (Fig. 3c-d) figures to simultaneously illustrate the lateral  
11 movement of TCR-CD3 $\zeta$  complexes on lipid bilayer or glass surface (x-y axis) (Extended Data  
12 Fig. 11a-b) and the intramolecular TCR-CD3 $\zeta$  distance changes across the cell membrane (z axis)  
13 upon K5 pMHC engagement (Fig. 3c-d). Although the lateral trajectories of TCR-CD3 $\zeta$   
14 complexes are quite different between lipid bilayer and glass surface due to different anchorages  
15 of pMHCs (comparing Fig. 3a-d), their intramolecular TCR-CD3 $\zeta$  distances within a microcluster  
16 at equilibrium phase consistently showed a  $\sim 15$  Å difference before and after K5 pMHC ligation  
17 (Fig. 3c-d). Similarly, we found TCR-CD3 $\zeta$  conformational changes after TCRs binding to agonist  
18 MCC and weak agonist 102S. The extent of conformational change was dependent on the pMHC  
19 potency, as MCC and 102S pMHCs triggered  $\sim 10$  Å and  $\sim 5$  Å separation between TCR and CD3 $\zeta$   
20 after TCR-pMHC ligation, respectively. TCR-CD3 $\zeta$  conformational changes were restricted in  
21 TCR/CD3 $\zeta$  microclusters and no changes were observed outside of the microclusters (Extended  
22 Data Fig. 5a and 9-11). These data highlighted that the TCR-CD3 $\zeta$  conformational changes  
23 occurring at the TCR microclusters were driven by TCR-pMHC engagement, consistent with

1 previous reports that TCR microclusters are hotspots and essential structures for TCR signaling<sup>2,18-</sup>  
2 <sup>20</sup>. To better reveal the *in situ* TCR-CD3 $\zeta$  conformational dynamics, we plotted the time  
3 trajectories of intramolecular TCR-CD3 $\zeta$  distance changes on both the lipid bilayer (Fig. 3e) and  
4 glass surface (Fig. 3f) against the stimulation time of each pMHC. We found that the TCR  
5 extracellular domain started to separate from its intracellular CD3 $\zeta$  upon TCR-pMHC ligation,  
6 and this process took several minutes to reach a stable and extended TCR-CD3 $\zeta$  conformational  
7 state depending on the pMHC potency, molecular mobility and TCR microcluster size.  
8 Interestingly, we found that the TCR-CD3 $\zeta$  conformational changes have a 5-minute delay on the  
9 glass surface compared to those on the lipid bilayer (compare Fig. 3e to 3f), highlighting the  
10 importance of molecular mobility and microcluster size in TCR signaling. The delay of TCR-  
11 CD3 $\zeta$  conformational changes was due to the permanent anchorage of pMHCs on glass surface,  
12 which decelerated the formation as well as reduced the size of TCR microclusters, the hotspots for  
13 signaling. The separation of CD3 $\zeta$  from the TCR is dependent on the potency of a pMHC, as  
14 demonstrated by the amplitude (Fig. 3g) and speed (Fig. 3h) of TCR-CD3 $\zeta$  conformational  
15 changes upon TCR ligation with different pMHCs. Taken with the aforementioned TCR-pMHC  
16 bond measurements on the cell surface, our data together showed that the TCR-pMHC bond length  
17 directly determines the conformational change of TCR-CD3 $\zeta$  in an inversely proportional manner.  
18 Importantly, our data further showed that TCR-bond length precisely controls the level of CD3 $\zeta$   
19 phosphorylation through TCR-CD3 $\zeta$  conformational change (Fig. 3 i-k and Extended Data Fig.  
20 11c). Among three ligands tested, we found that the most potent K5 formed the shortest TCR-  
21 pMHC bond (Fig. 2d), caused the largest separation between TCR and CD3 $\zeta$  (Fig. 3 e-f), and led  
22 to the most complete dissociation of CD3 $\zeta$  from the inner leaflet of the plasma membrane to  
23 maximize the exposure of ITAMs on CD3 $\zeta$  for subsequent phosphorylation (Fig. 3 i-k). By



1 contrast, the least potent 102S formed the longest bond with the TCR (Fig. 2d), caused the smallest  
2 TCR-CD3 $\zeta$  conformational change (Fig. 3 e-f) and resulted in the weakest phosphorylation of  
3 CD3 $\zeta$  (Fig. 3i-k). Thus, our transmembrane FRET not only directly visualized TCR-CD3 $\zeta$   
4 conformational changes *in situ*, but also explained the molecular mechanism of signal propagation  
5 through CD3 $\zeta$  phosphorylation for TCR ligand discrimination.

6 We then designed a series of experiments to test how TCR-pMHC bond length controls TCR  
7 binding, signaling and activation. To test how the TCR-pMHC bond length regulates TCR-pMHC  
8 interaction, we performed micropipette adhesion assays to measure the *in situ* two-dimensional  
9 (2D) TCR-pMHC binding kinetics and affinities<sup>4</sup> (Fig. 4a-d, Table-1, Extended Data Fig. 2b,  
10 Extended Data Table 1 and Supplementary Movie 8). As revealed by the co-existence of high  
11 binding affinity and short bond length, our data suggested that higher binding affinity drives the  
12 formation of more compact TCR-pMHC bond, consistent with the classic bond length theory in  
13 biochemistry<sup>21</sup>. To determine how TCR-pMHC bond length controls T-cell signaling, we devised  
14 a fluorescent micropipette to measure the real-time T-cell calcium signaling at the single cell level  
15 (Fig. 4e-f, Extended Data Fig. 14 and Supplementary Movie 9). We further adapted the values of  
16 half-maximal T-cell proliferation ( $EC_{50}$ ) and 3D half-lives of tetramer binding from reference 9.  
17 We then plotted the TCR-pMHC bond lengths and TCR-CD3 $\zeta$  intramolecular distances against  
18 2D on-rates, 2D affinities, signaling, and proliferation and 3D tetramer half-lives (Extended Data  
19 Fig. 15). Strong negative (Fig. 4g top row, solid dots and lines) and positive (Fig. 4g bottom row,  
20 open dots and dashed lines) correlations were found between intermolecular TCR-pMHC bond  
21 length and intramolecular TCR-CD3 $\zeta$  distance versus all metrics of TCR binding, signaling and  
22 activation, respectively. These measurements provided direct physiological relevance to our  
23 studies of TCR-pMHC bond length and TCR-CD3 $\zeta$  conformational change.

1           In summary, our data together suggested a “bond length model” in which a TCR deciphers  
2 the structural differences between foreign- and self-peptides by forming TCR-pMHC bonds with  
3 different lengths (and strengths), which proportionally pull the otherwise sequestered CD3 $\zeta$  off  
4 the inner leaflet of the plasma membrane (Fig. 4h) to expose appropriate degrees of ITAMs for  
5 subsequent phosphorylation (Fig. 4i) in a precisely controlled manner. Mechanical forces<sup>4,22–24</sup> and  
6 calcium feedback regulation<sup>25</sup> are the most likely mechanisms of CD3 $\zeta$  sequestration off the inner  
7 leaflet. Our “bond length model” (Fig. 4j) is compatible with existing TCR triggering models<sup>6,26</sup>,  
8 can well explain previous studies of CD3 conformational changes<sup>27–30</sup> and suggests that T cells  
9 use simple, reliable and efficient machinery to faithfully translate extracellular TCR-pMHC  
10 binding to proper intracellular signaling for optimal T-cell triggering. Our results revealed the  
11 dynamic process of how the recognition signal is initiated, controlled and transmitted by directly  
12 linking intermolecular TCR-pMHC bond length and intramolecular TCR-CD3 $\zeta$  distance to T-cell  
13 surface binding, intracellular signaling and functional response, thus explaining the molecular  
14 mechanism of TCR recognition at the very first step.

1       **References**

2

- 3       1.     Irvine, D. J., Purbhoo, M. A., Krogsgaard, M. & Davis, M. M. Direct observation of  
4       ligand recognition by T cells. *Nature* **419**, 845–849 (2002).
- 5       2.     Huang, J. *et al.* A Single peptide-major histocompatibility complex ligand triggers digital  
6       cytokine secretion in CD4+ T Cells. *Immunity* **39**, 846–857 (2013).
- 7       3.     Huppa, J. B. *et al.* TCR-peptide-MHC interactions in situ show accelerated kinetics and  
8       increased affinity. *Nature* **463**, 963–967 (2010).
- 9       4.     Huang, J. *et al.* The kinetics of two-dimensional TCR and pMHC interactions determine  
10      T-cell responsiveness. *Nature* **464**, 932–936 (2010).
- 11     5.     Ha, T. *et al.* Probing the interaction between two single molecules: fluorescence resonance  
12      energy transfer between a single donor and a single acceptor. *Proc. Natl. Acad. Sci.* **93**,  
13      6264–6268 (1996).
- 14     6.     van der Merwe, P. A. & Dushek, O. Mechanisms for T cell receptor triggering. *Nat Rev*  
15      *Immunol* **11**, 47–55 (2010).
- 16     7.     Rudolph, M. G., Stanfield, R. L. & Wilson, I. A. How TCRs bind MHCs, peptides, and  
17      coreceptors. *Annu. Rev. Immunol.* **24**, 419–66 (2006).
- 18     8.     Sasmal, D. K., Pulido, L. E., Kasal, S. & Huang, J. Single-molecule fluorescence  
19      resonance energy transfer in molecular biology. *Nanoscale* **8**, 19928–19944 (2016).
- 20     9.     Corse, E., Gottschalk, R. A., Krogsgaard, M. & Allison, J. P. Attenuated T Cell Responses  
21      to a High-Potency Ligand In Vivo. *PLoS Biol.* **8**, e1000481 (2010).

- 1      10.    Natarajan, K. *et al.* An allosteric site in the T-cell receptor C $\beta$  domain plays a critical  
2            signalling role. *Nat. Commun.* **8**, 15260–13 (2017).
- 3      11.    Newell, E. W. *et al.* Structural Basis of Specificity and Cross-Reactivity in T Cell  
4            Receptors Specific for Cytochrome c-I-E. *J. Immunol.* **186**, 5823–5832 (2011).
- 5      12.    Yang, H. *et al.* Protein conformational dynamics probed by single-molecule electron  
6            transfer. *Science* **302**, 262–6 (2003).
- 7      13.    Choudhuri, K., Wiseman, D., Brown, M. H., Gould, K. & van der Merwe, P. A. T-cell  
8            receptor triggering is critically dependent on the dimensions of its peptide-MHC ligand.  
9            *Nature* **436**, 578–582 (2005).
- 10     14.    Choudhuri, K. *et al.* Peptide-Major Histocompatibility Complex Dimensions Control  
11            Proximal Kinase-Phosphatase Balance during T Cell Activation. *J. Biol. Chem.* **284**,  
12            26096–26105 (2009).
- 13     15.    Hui, E. *et al.* T cell costimulatory receptor CD28 is a primary target for PD-1-mediated  
14            inhibition. *Science* **355**, 1428–1433 (2017).
- 15     16.    Davis, S. J. & van der Merwe, P. A. The kinetic-segregation model: TCR triggering and  
16            beyond. *Nat. Immunol.* **7**, 803–809 (2006).
- 17     17.    Mossman, K. D., Campi, G., Groves, J. T. & Dustin, M. L. Altered TCR signaling from  
18            geometrically repatterned immunological synapses. *Science* **310**, 1191–3 (2005).
- 19     18.    Yokosuka, T. *et al.* Newly generated T cell receptor microclusters initiate and sustain T  
20            cell activation by recruitment of Zap70 and SLP-76. *Nat Immunol* **6**, 1253–1262 (2005).
- 21     19.    Campi, G., Varma, R. & Dustin, M. L. Actin and agonist MHC-peptide complex-  
22            dependent T cell receptor microclusters as scaffolds for signaling. *J. Exp. Med.* **202**,

- 1           1031–6 (2005).
- 2       20. Taylor, M. J., Husain, K., Gartner, Z. J., Mayor, S. & Vale, R. D. A DNA-Based T Cell  
3           Receptor Reveals a Role for Receptor Clustering in Ligand Discrimination. *Cell* **169**, 108–  
4           119.e20 (2017).
- 5       21. Berg, J. M., Tymoczko, J. L., Stryer, L. & Stryer, L. *Biochemistry, 5th Ed.* (W H Freeman,  
6           New York).
- 7       22. Liu, B., Chen, W., Evavold, B. D. & Zhu, C. Accumulation of dynamic catch bonds  
8           between TCR and agonist peptide-MHC triggers T cell signaling. *Cell* **157**, 357–368  
9           (2014).
- 10      23. Basu, R. *et al.* Cytotoxic T Cells Use Mechanical Force to Potentiate Target Cell Killing.  
11           *Cell* **165**, 100–110 (2016).
- 12      24. Sibener, L. V *et al.* Isolation of a Structural Mechanism for Uncoupling T Cell Receptor  
13           Signaling from Peptide-MHC Binding. *Cell* **174**, 672–687.e27 (2018).
- 14      25. Shi, X. *et al.* Ca<sup>2+</sup>regulates T-cell receptor activation by modulating the charge property  
15           of lipids. *Nature* **493**, 111–115 (2013).
- 16      26. Chakraborty, A. K. & Weiss, A. Insights into the initiation of TCR signaling. *Nat.*  
17           *Immunol.* **15**, 798–807 (2014).
- 18      27. Gil, D., Schamel, W. W. A., Montoya, M., Sánchez-Madrid, F. & Alarcón, B. Recruitment  
19           of Nck by CD3 $\epsilon$  Reveals a Ligand-Induced Conformational Change Essential for T Cell  
20           Receptor Signaling and Synapse Formation. *Cell* **109**, 901–912 (2002).
- 21      28. Xu, C. *et al.* Regulation of T Cell Receptor Activation by Dynamic Membrane Binding of  
22           the CD3 $\epsilon$  Cytoplasmic Tyrosine-Based Motif. *Cell* **135**, 702–713 (2008).

- 1        29.    Guo, X. *et al.* Lipid-dependent conformational dynamics underlie the functional versatility  
2            of T-cell receptor. *Cell Res.* **27**, 505–525 (2017).
  
- 3        30.    Lee, M. S. *et al.* A Mechanical Switch Couples T Cell Receptor Triggering to the  
4            Cytoplasmic Juxtamembrane Regions of CD3 $\zeta\zeta$ . *Immunity* **43**, 227–239 (2015).

1     **Acknowledgements** We thank Mark M. Davis at Stanford for providing the constructs of anti-  
2     TCR single-chain variable fragments, Michael Birnbaum at MIT for providing IE<sup>k</sup> plasmids,  
3     Xiaolei Su and Marcus Taylor at UCSF for advice in the preparation of glass supported lipid  
4     bilayer and the NIH Tetramer Core Facility for providing pMHC monomers. This work was  
5     supported by NIH grants R00AI106941 and R21AI120010, NSF CAREER Award 1653782, and  
6     Chicago Biomedical Consortium Catalyst Award (to J.H.) and postdoctoral grant PDR-092 (to  
7     D.K.S.) with support from the Searle Funds at The Chicago Community Trust.

8  
9     **Author Contributions** J.H. conceived, directed and supervised the project. J.H. and D.K.S.  
10    designed experiments. D.K.S. custom built the fluorescence microscopy system, performed  
11    imaging experiments, and analyzed data unless indicated otherwise. W.F. and D.K.S. custom built  
12    the micropipette system. W.F. performed all 2D binding kinetics assays and analyzed the data.  
13    W.F. and D.K.S. performed Ca<sup>2+</sup> imaging experiments and D.K.S. analyzed data. Reagents and  
14    experimental systems were designed and tested by D.K.S. unless indicated otherwise. S.R. and  
15    E.A. generated IE<sup>k</sup> proteins. H.L. and J.Q. performed PMF analysis. G.C. analyzed smFRET data.  
16    Y.H. and H.S. prepared the CD3ζ-GFP construct and infected primary T cells. C.C. performed  
17    phospo flow cytometry. D.K.S. and P.L. cultured T cells. D.K.S. and J.H. wrote the manuscript  
18    with input from all authors.

19  
20    **Competing interests** All authors declare no competing interests.

- 1 **Additional information**
- 2 **Extended data** This section contains 15 Extended Data Figures and captions.
- 3 **Supplementary Information** This section contains Supplementary Movies 1-9 and captions.



1       **METHODS**

2       **Mice.** The Institutional Animal Care and Use Committee of the University of Chicago approved  
3       the animal protocols used in this study. 5C.C7 TCR-transgenic RAG2 knockout mice in B10.A  
4       background were a generous gift from NIAID.

5  
6       **Cells.** 5C.C7 T cell blasts were obtained by stimulating lymph node and spleen cells from  
7       transgenic mice with 10  $\mu$ M MCC peptide (amino acids 88–103, ANERADLIAYLKQATK). T  
8       cell blasts were maintained in complete medium (RPMI 1640 medium, 10% fetal calf serum, 2  
9       mM L-glutamine, 50  $\mu$ M  $\beta$ -mercaptoethanol, and penicillin-streptomycin). T-cell blasts were used  
10      on days 6–9 for imaging and micropipette experiments. Live T cells were separated from dead  
11      cells by Ficoll-Paque density gradient media (GE). The B-cell lymphoma cell line CH27 was used  
12      as APCs. APCs were maintained in the same medium as T cells<sup>2,3</sup>. Human RBCs were isolated  
13      from whole blood of healthy donors from the Hospital of the University of Chicago according to  
14      protocols approved by the Institutional Review Board of the University of Chicago.

15  
16      **Reagents.** 1-palmitoyl-2-oleoyl-*sn*-glycero-3-phosphocholine (POPC), 1,2-dioleoyl-*sn*-glycero-  
17      3-[(N-(5-amino-1-carboxypentyl) iminodiacetic acid) succinyl] nickel salt (DGS-NTA-Ni<sup>2+</sup>) and  
18      1,2-dioleoyl-*sn*-glycero-3-phosphoethanolamine-N [methoxy (polyethyleneglycol)-5000]  
19      ammonium salt (PEG5000 PE) were purchased from Avanti Polar Lipids. PBS, BSA, FBS, and  
20      Alexa Fluor 568 C5 Maleimide were purchased from Thermo Fischer Scientific. PEG-NTA-Ni<sup>2+</sup>  
21      coated cover glasses were purchased from MicroSurfaces, Inc. Nunc Lab-Tek 8-well chambered  
22      cover glasses were purchased from Thermo Fisher Scientific. His-tagged B7 was made as  
23      previously reported<sup>3</sup>. His-tagged ICAM-1 was purchased from Sino Biological. Cy3 and Cy5

1 maleimide mono-reactive dyes were purchased from GE Life Sciences. Alexa-568, Fura-4 and di-  
2 methyl sulfoxide (DMSO) were purchased from Thermo Scientific. LB-media were from Fisher  
3 Scientific.

4  
5 **pMHCs.** For FRET experiments between TCR and pMHC on the cell surface (FRET1), we  
6 generated peptide exchangeable CLIP-IE<sup>k31</sup>. The  $\alpha$  and  $\beta$  chains of CLIP-IE<sup>K</sup> were cloned in pAC  
7 vectors with gp67 signal sequence (BD biosciences), acidic or basic zipper sequences and a 6-  
8 histidine tag at the C terminus. Primary baculoviruses were prepared for each chain by co-  
9 transfecting the construct with linearized Baculovirus DNA (BestBac 2.0, Expression Systems)  
10 into the Sf9 cells using cellfectin reagent (Thermo Fischer Scientific), cells were washed and  
11 incubated at 27 °C for a week. Primary viruses were harvested by centrifugation and collecting the  
12 supernatant. Baculoviruses were amplified for higher titer by infecting Sf9 cells for another week.  
13 Hi5 cells were co-infected with baculovirus for both chains and supernatant was harvested after  
14 65 hours of infection. The pH of supernatant was adjusted to pH 6.9 with HEPES buffer saline (10  
15 mM HEPES pH 7.2, 150 mM NaCl, 0.02% NaN<sub>3</sub>) and 20 mM imidazole pH 7.2, 5 mM MgCl<sub>2</sub>,  
16 0.5 mM NiCl<sub>2</sub>. Ni-NTA agarose (Qiagen) was added to the supernatant and stirred overnight at 4  
17 °C. Supernatant was filtered, Ni-NTA agarose was collected and CLIP-IE<sup>K</sup> was eluted using 200  
18 mM imidazole, pH 7.2 in HBS. Protein fractions were analyzed in SDS-PAGE. CLIP-IE<sup>K</sup> was  
19 purified using Superdex 200 size exclusion column chromatography and Mono-Q anion exchange  
20 chromatography (GE healthcare). Purified fractions were used for peptide loading. According to  
21 previous publication<sup>3</sup>, peptides with fluorescent maleimide dye (Cy3) at the C-terminus, including  
22 K5(C)-ANERADLIAYFKAATKdFGGdSdC, MCC(C)-ANERADLIAYLKQATKGGdSdC,  
23 T102S(C)-ANERADLIAYLKQASKGGdSdC, null(C)-ANERAELIAYLTQAAKGGGdSdC

1 were synthesized, labeled with Cy3, purified by HPLC and confirmed by mass spectroscopy by  
2 ELIM BIOPHARM company, CA. Peptides of interest were added to the purified CLIP-IE<sup>k</sup> protein  
3 at 100-fold molar excess for the peptide exchange reaction. The thrombin (1 U /100 μg of IE<sup>k</sup>) was  
4 added and incubated at 37 °C for one hour. The pH of the solution was lowered by adding MES  
5 buffer, pH 6.2 to a final concentration of 30 mM, and IE<sup>k</sup> was again incubated at 37 °C overnight.  
6 The pH of protein solution was adjusted with 40 mM HEPES, pH 7.2. Extra peptides and denatured  
7 proteins were removed by centrifugation (16,000×g for 30 min at 4 °C) and desalting twice with  
8 Zeba Spin Desalting Columns (Thermo Fisher).

9 For FRET experiments between TCR and CD3ζ across the cell membrane (FRET2) and  
10 2D micropipette adhesion assays, we used IE<sup>k</sup> pMHC monomers generated by the NIH Tetramer  
11 Core Facility. Biotinylated, monomeric IE<sup>k</sup> were covalently complexed with  
12 ANERADLIAYFKAATKF (K5), ANERADLIAYLKQATK (MCC), ANERADLIAYLKQASK  
13 (102S) and PVSKMRMATPLLMQA (human CLIP 87-101) peptides. IE<sup>k</sup> monomers were  
14 aliquoted and stored at -80 °C for experiments.

15  
16 **Production and Labeling of Single Chain Variable Fragments (scFvs).** Plasmid constructs of  
17 two mutants of anti-TCR scFvs J1 and J3 were a generous gift from Mark M. Davis at Stanford  
18 University<sup>3</sup>. J1 was used for cell surface FRET1 and J3 was used for transmembrane FRET2  
19 experiments, respectively. To generate J1 and J3 proteins, BL21 bacteria were transfected with  
20 cDNA and cultured in large scale (2 L each) in the presence of Isopropyl β-D-1-  
21 thiogalactopyranoside. Bacteria were spun down, and cell pellets were resuspended with B-PER  
22 (Bacterial Protein Extraction Reagent, Thermo Fisher), lysozyme, and DNase, followed by  
23 washing with inclusion wash buffer (100 mM NaCl, 50 mM Tris Base, 0.05% (volume) Triton X-

1 100)<sup>32</sup>. Refolding and purification of recombinant scFvs were performed using a modified method  
2 based on previous publications<sup>33,34</sup>. In brief, scFvs were unfolded in the presence of 10 mM  $\beta$ -  
3 mercaptoethanol for 2 hours at 25 °C (in 100 mL of 100 mM Tris-HCl buffer with pH = 8.0, 6 M  
4 GuHCl and 200 mM NaCl), so that it could be refolded in correct conformations by step-wise  
5 dialysis methods without causing protein oxidation. To remove the reducing agent, denatured  
6 recombinant scFvs were dialyzed against 1 L of 100 mM Tris-HCl, pH 8.0 buffer with 6 M GuHCl  
7 and 200 mM NaCl for 15 hours at 4 °C with gentle stirring. After that, stepwise dialyses were  
8 performed in the same Tris-HCl buffer containing decreasing GuHCl concentrations (4 M, 2 M, 1  
9 M, 0.5 M and 0 M) for 15 hours each step at 4 °C with gentle stirring. During 1 M and 0.5 M  
10 dialysis steps, 400 mM L-arginine (Sigma-Aldrich) and 375  $\mu$ M of oxidized glutathione (Sigma-  
11 Aldrich) were added. Final dialysis was performed in buffer without GuHCl for 18 hours at 4 °C  
12 with gentle stirring. Protein was concentrated and stored at 4 °C before long-term storage at -20  
13 °C in the presence of 50% Glycerol. Purified scFVs were labeled with Cy5-malimide in the  
14 presence of 50  $\mu$ M of tris-(2-carboxyethyl) phosphine hydrochloride (TCEP) for two hours at room  
15 temperature followed by 12 hours gentle mixing at 4 °C. Then the labeled scFVs were purified by  
16 resin spin column. J1 and J3 were labeled and purified freshly before each experiment. The binding  
17 specificity of scFvs for 5C.C7 TCRs was confirmed by Flow cytometry before imaging  
18 applications.

19  
20 **CD3 $\zeta$ -GFP Transduction.** Primary 5C.C7 T cells were retrovirally transduced with CD3 $\zeta$ -GFP  
21 according to a previously published method<sup>35</sup>. Ecotropic platinum-E retroviral packaging cells  
22 were transiently transfected with MIG-CD3 $\zeta$ -GFP vector by calcium phosphate precipitation.  
23 Viral supernatant was harvested twice at 48 hours and 72 hours post transfection, filtered by 0.2

1     μm cellulose acetate membrane and used for following experiments. Splenocytes isolated from  
2     5C.C7 mice were cultured in RPMI supplemented with 10% FCS, 2 mM glutamine, 50 μM 2-  
3     mercaptoethanol, 1 mM HEPES, 1 mM sodium pyruvate, 1X glutamine and non-essential amino  
4     acids (Thermo Fisher), 100 U/mL penicillin, 100 μg/mL streptomycin, and 50 μg/mL gentamycin,  
5     and stimulated with pre-coated 1.5 μg/mL anti-CD3ε Ab (Clone 145-2C11, University of Chicago  
6     Monoclonal Antibody Facility) and 0.5 μg/mL anti-CD28 Ab (Clone 37.51, Biolegend) in the  
7     presence of 40 U/mL recombinant human IL-2 (Peprotech). After 24 hours of cell activation, 2 mL  
8     viral supernatant were spun down in a well of a Retronectin (Clontech) pre-coated (12.5 μg/mL in  
9     PBS, 4°C overnight) 6-well plate for 90 min at 3,000 g, and then the stimulated cells were  
10    transferred to the plate and spun down in the viral supernatant supplemented with 4 μg/mL  
11    protamine sulfate at 800 g for 90 min. The transduction rate of CD3ζ-GFP was determined by GFP  
12    fluorescence at least 16 hours after transduction.

13  
14    **Lipid Bilayer.** The glass-supported lipid bilayer preparation method was developed based on  
15    previous publications<sup>15,36</sup>. Lipid layer was made by mixing POPC (90%), DGS-NTA-Ni<sup>2+</sup> (9.9%)  
16    and PEG500PE (0.1%) in DMSO in clean glass vials. DMSO was dried by blowing 0.22 μm  
17    filtered N<sub>2</sub>, and then vials containing lipid layer were kept in vacuum for two hours to dry  
18    completely. The lipid layer was then resuspended in filtered PBS (pH 7.4) buffer (Clontech) at a  
19    concentration of 4 μmol/mL. To decrease the size of the multilamellar lipid vesicles to unilamellar  
20    vesicles, the cloudy vesicle solution was repeatedly frozen in liquid nitrogen and thawed in 37 °C  
21    water bath 30 times until the solution become clear. The unilamellar vesicle solution was stored in  
22    -80 °C for future experiments. Before each experiment, a tube was centrifuged at 33,000×g for 45  
23    minutes at 4 °C. The supernatant was incubated for 90 minutes on the 8-well Lab-Tek chamber

1 cover glass that was prewashed thoroughly by 5N NaOH twice at 50 °C and followed by PBS  
2 twice at 37 °C. The lipid vesicles fused on the glass surface and formed the glass supported lipid  
3 bilayer. The lipid bilayer was washed three times thoroughly with PBS to remove excess lipid.  
4 Then a mixture of his-tagged, fluorescently-labeled pMHC and his-tagged, non-fluorescent  
5 ICAM-1 and B7 was added to the lipid bilayer and incubated for 1 hour. After 30 min, unbound  
6 proteins were washed off by PBS for three times. The bound protein was incubated for another 30  
7 min at 37 °C, and weakly bound proteins were washed off with PBS for an additional three times.  
8 The protein-bound lipid was incubated with 1% BSA for 20 minutes to minimize background  
9 fluorescence during microscopy experiments. Excess BSA was washed three times with PBS.  
10 Microscopy experiments were performed using imaging buffer: PBS pH 7.4, 137 mM NaCl, 5 mM  
11 KCl, 1 mM CaCl<sub>2</sub>, 2 mM MgCl<sub>2</sub>, 0.7 mM Na<sub>2</sub>HPO<sub>4</sub>, 6 mM D-glucose and 1% BSA.

12 The fluidity and integrity of lipid bilayer were tested by fluorescence recovery after  
13 photobleaching (FRAP) experiments with 32 nM Cy3-labeled pMHC reconstituted on supported  
14 lipid bilayer (Extended Data Fig. 3 and Supplementary Movie 2). Photobleaching was performed  
15 by a high power (60 mW) 532-nm CW-laser for 5 second exposure at the center of the imaging  
16 area, and the fluorescence recovery of lipid bilayer was imaged by a 470 ± 10 nm LED light with  
17 10 seconds interval. The power and duration of laser and LED light excitation were controlled by  
18 analog modulation. The diffusion coefficient ( $D$ ) was determined by labeling the lipid bilayer with  
19 1 nM of Cy3-labeled pMHC. The experimentally determined diffusion coefficient  $D_e$  was verified  
20 by a small-scale simulation  $D_s$  which showed excellent resemblance (Extended Data Fig. 4 and  
21 Supplementary Movie 1). pMHC diffusion constant was determined by TrackArt programming in  
22 MatLab, consistent with the previously reported values<sup>37</sup>.

23

1     **Microscopy.** All imaging experiments were performed using our custom-built total internal  
2     reflection fluorescence (TIRF) and epi-fluorescence microscope setup, which was based on a  
3     Nikon-Ti-E inverted microscope attached with an Optosplit-III (CAIRN Research) and an Andor  
4     iXon 888 EMCCD camera (1024×1024 pixel) (Extended Data Fig. 2a). Individual CW laser lines  
5     of 405-nm, 488-nm, 532-nm and 647-nm (Cobolt) were aligned to achromatic fiber port (APC  
6     type, 400-700 nm Thorlabs, Inc) and then passed through an achromatic polarization maintaining  
7     single-mode fiber to a motorized Nikon TIRF illuminator. The lasers were reflected by a custom-  
8     built quad-band dichroic mirror (Chroma, ZT405-488-532-640rcp) to the sample through a 1.42  
9     NA 100× TIRF objective. A 7-color solid state LED light source with band-pass filters was also  
10    attached with a liquid light guide to the upper filter cube wheel in the Nikon microscope. The  
11    fluorescence from donor and acceptor passed through quad band laser clean-up filter (ZET405-  
12    488-532-647m) and then passed through Optosplit III to separate the emission fluorescence of  
13    FRET donor and acceptor. In optosplit cube, we used different filter sets for FRET1 and FRET2  
14    experiments. For FRET1 (Cy3-Cy5), we used T640lpxr-UF2 (Chroma) as dichroic and ET585/65  
15    for Cy3 channel (Chroma) and ET655lp for Cy5 channel (Chroma) for individual fluorescence  
16    signal. For FRET2 (GFP-Alexa568), we used dichroic T560lpxr-UF2 and two band pass filters  
17    Chroma ET510/20m for GFP and Chroma ET595/50m for Alexa-568. For single-molecule  
18    imaging, we applied hardware sequencing to get the highest frame rate (5-10 ms exposure, 90-210  
19    frame/second) using high EM gain. Either hardware sequencing (by camera) or software  
20    (Micromanager) sequencing was applied with analog modulation to synchronize the image  
21    acquisition by EMCCD camera that triggers each laser and individual LED source. The donor and  
22    acceptor signals channels were physically separated out by the beam splitter in Optosplit-III and

1 both signals were imaged simultaneously on the same image frame. Hardware stage control and  
2 images were acquired by Micromanager<sup>38</sup>.

3  
4 **2D Fluorescent Micropipette.** The micropipette apparatuses were centered around a Leica  
5 inverted microscope placed on an anti-vibration table (Newport) equipped with manometer  
6 systems to apply suction pressures through glass pipettes (Extended Data Fig. 2b). Two opposing  
7 pipettes are attached to two identical piezoelectric micromanipulators (Sensapex) to control  
8 contacts between a T cell and a pMHC coated RBC or a CH27 APC. In the micropipette apparatus,  
9 one of the pipettes was also attached to a PI piezo actuator to allow computer-programmed fine  
10 movements for the repeated adhesion test cycles. The cell chamber to the desired size was prepared  
11 by cutting cover glass. Temperature of the cell chamber (37 °C) was controlled by an objective  
12 heater (Bioptechs). To avoid medium evaporation for heating, the chamber was sealed by mineral  
13 oil (Sigma). The real-time images were acquired by an Andor iXon 888 EMCCD camera through  
14 100× objective and Micromanager software. For real-time calcium imaging, the sample was  
15 illuminated by sequentially triggered light exposure of  $470 \pm 20$  nm blue light (Spectra X,  
16 Lumencor) and white LED light. Triggering of light channels and data acquisition were performed  
17 in analog modulation using Micromanager<sup>38</sup>. For 2D kinetic measurements, only continuous white  
18 LED light was used to detect the adhesion between a T cell and a pMHC coated RBC.

19  
20 **2D Micropipette Kinetic Assay.** 2D micropipette adhesion experiments<sup>4</sup> were performed using  
21 T cell blasts<sup>2</sup> and pMHC-coated RBCs. Monomeric pMHCs were coated onto RBCs by biotin-  
22 streptavidin coupling. RBCs isolated from the whole blood were biotinylated using different  
23 concentrations of biotin-X-NHS according to the manufacturer's instructions. 10  $\mu$ l RBCs solution



1 (~ $10 \times 10^6$ ) with 2 mg/mL streptavidin solution (10  $\mu$ l) were mixed for 30 min at 4 °C and then  
2 incubated with 20  $\mu$ g/mL biotinylated pMHC monomers for 30 min at 4 °C. After each step, cells  
3 were washed three times.

4 To determine the surface receptor and ligand densities, T cells were incubated with a PE-  
5 conjugated anti-mouse TCR  $\beta$  chain antibody clone H57-597 (BD) at 10  $\mu$ g/mL in 200  $\mu$ l of FACS  
6 buffer (RPMI 1640, 5 mM EDTA, 1% BSA and 0.02% sodium azide) at 4 °C for 30 min, and  
7 pMHC-coated RBCs were stained with a PE-conjugated anti-IE<sup>k</sup> clone 14.4.4s (BD). T cells and  
8 RBCs were analyzed by a BD LSRFortessa flow cytometer. The fluorescence intensities were  
9 compared to standard calibration beads (BD Quantibrite PE Beads, BD) to determine the total  
10 number of molecules per cell, which were divided by the cell or bead surface area to obtain site  
11 densities. The apparent surface areas of T cells blasts (523  $\mu$ m<sup>2</sup>) and RBC surface area (140  $\mu$ m<sup>2</sup>)  
12 were calculated as the areas of smooth spheres from their radii measured microscopically.

13 T cells were incubated at 37°C in saturating conditions (10  $\mu$ g/mL) of purified anti-mouse  
14 CD4 (clone GK 1.5, BD) prior to addition to chamber. The RBC was driven in and out of contact  
15 with T cell with controlled contact time (0.25, 0.5, 0.75, 1, 2, and 5 s) and area by computer  
16 programming. Adhesion events were detected by observing RBC elongation upon cell separation.  
17 The contact-retraction cycle was repeated fifty times for a given contact time. Specific adhesion  
18 probability ( $P_a$ ) at each contact time point was calculated by subtracting the nonspecific adhesion  
19 frequency ( $P_{nonspecific}$ ). Following equations were used to analyze the data.

20  $P_a$  versus contact time  $t$  were fitted using a probabilistic model (Equation 1)<sup>39</sup>:

$$21 \quad P_a = 1 - \exp\{-m_r m_l A_c K_a [1 - \exp(-k_r t)]\} \quad (1)$$

22

23

1           Where  $K_a$  and  $k_r$  are the 2D binding affinity and off-rate,  $m_r$  and  $m_l$  are the respective TCR  
2           and pMHC densities that were measured by flow cytometry, and  $A_c$  is the contact area. The curve-  
3           fitting generates two parameters, the effective 2D affinity  $A_c K_a$  and the 2D off-rate  $k_r$ . Its product  
4           with the off-rate is the effective 2D on-rate:

$$A_c k_{on} = A_c K_a \times k_r \quad (2)$$

$$P_a = \frac{(P_{measured} - P_{nonspecific})}{1 - P_{nonspecific}} \quad (3)$$

10           where  $P_{nonspecific}$  and  $P_{measure}$  are the nonspecific adhesion fraction and the total measured  
11           adhesion, respectively.

12  
13           **FRET Analysis.** FRET is a nonradiative process and originated by dipole-dipole interaction  
14           between the electronic states of donor and acceptor<sup>8,40</sup> The energy transfer occurs only when the  
15           oscillations of an optically-induced electronic coherence of the donor are resonant with the  
16           electronic energy gap of the acceptor. Efficiency of energy transfer ( $E_{FRET}$ ) is sensitive to the inter-  
17           distance between the donor and acceptor, which is typically in the range of 10-100 Å. The energy  
18           transfer efficiency ( $E_{FRET}$ ) is given by<sup>8,40</sup>:

$$E_{FRET} = \frac{1}{1 + (r/R_0)^6} \quad (4)$$

1           Where  $r$  is inter-distance between donor ( $D$ ) and acceptor ( $A$ ), and  $R_0$  is Förster's distance.  
2           FRET is very sensitive to the distance between the acceptor and the donor, which may change due  
3           to conformation dynamics or other factors. The  $E_{FRET}$  between  $D$  and  $A$  was calculated by a  
4           ratiometric method to reveal the conformational dynamics using the following equation<sup>8,40</sup>:

$$5 \quad E_{FRET}(t) = \frac{I_A(t)}{I_A(t) + I_D(t) \times \frac{\Phi_A \times \eta_A}{\Phi_D \times \eta_D}} \approx \frac{I_A(t)}{I_A(t) + I_D(t)} \quad (5)$$

7  
8           Where  $I$  is fluorescence intensity,  $\Phi$  is emission quantum yield,  $\eta$  is photon detection  
9           efficiency. Here the correction factor is  $\sim 1$  in our experimental condition.

10           To obtain the distribution of the FRET efficiencies,  $E_{FRET}$ , and the corresponding distance  
11           between a FRET donor and a FRET acceptor, we tracked and measured the fluorescence intensities  
12           of the donor and the acceptor. For each experiment, image registration was first performed using  
13           MATLAB on the images of the corresponding frame from Donor Channel and Acceptor Channel.  
14           The donor and acceptor molecules were identified and tracked using TrackMate in ImageJ until  
15           the end of each FRET trajectory. The fluorescence intensities of a donor and an acceptor were  
16           measured and background corrected frame-by-frame. Equations 4 and 5 were applied to calculate  
17            $E_{FRET}$  and corresponding distance for both FRET1 (Cy3 and Cy5) and FRET2 (GFP and Alexa568)  
18           experiments. By tracking the trajectories of many individual FRET pairs, we obtained the values  
19           and distribution of  $E_{FRET}$  and corresponding distance.

20

21

1 **Potential-of-Mean-Force (PMF) Analysis.** One way to quantify the binding strength is to  
2 examine the potential-of-mean-force (PMF) for the fluctuation of donor-receptor distance  $R$ . The  
3 PMF in this context is given by<sup>12,41</sup>:

$$4 \quad F(R) = -k_B T \times \ln(P(R)) \quad (6)$$

6  
7 where  $P(R)$  is the histogram of the distance that has been averaged over the steady-state signals  
8 collected over 8,000 independent TCR-pMHC binding events. The PMF measures the free energy  
9 cost of variation in distance  $R$ . It is minimized at equilibrium. Its curvature governs the size of  
10 fluctuation. Shallower potential implies wilder fluctuation and weak binding.

11  
12 **Microclusters Tracking Analysis.** In FRET2 analysis, we developed a method to track individual  
13 TCR and CD3 $\zeta$  micro-clusters in three dimensions (x, y and z) using TrackMate plugin in Fiji<sup>42</sup>.  
14 The track of each individual donor and acceptor cluster gave the lateral movement (x-y axis) as  
15 well as FRET2 efficiency (TCR-CD3 distance, z axis) as microclusters moving towards the center  
16 and forming the immunological synapse.

17  
18 **Measurement of CD3 $\zeta$  phosphorylation.** We used phospho flow cytometry to measure the  
19 phosphorylation state of CD3 $\zeta$  at the single cell level<sup>43,44</sup>. CH27 cells were preincubated with 10  $\mu$ M  
20 peptides in complete medium for 3 hours at 37 °C. Plain CH27 cells were used as a negative  
21 control. Peptide loaded CH27 cells were washed three times<sup>5</sup>. 5C.C7 T cells were rested in serum  
22 free RPMI medium at 37 °C for 3 hours to reduce the phosphorylation background<sup>5</sup>. 50,000  
23 peptide-loaded CH27 cells and 50,000 rested 5C.C7 T cells were precooled and mixed in a tube

1 on ice. The tube was centrifuged at 300× g for 1 min at 4 °C to initiate cell–cell contact, and  
2 immediately transferred to a 37 °C water bath for initiating T-cell stimulation. The stimulation was  
3 terminated at indicated time points with 4% PFA fixation. After 10 minutes fixation at room  
4 temperature, cells were washed twice with ice-cold PBS containing 2% BSA, and then  
5 resuspended in 80% methanol and incubated for 30 min at -20 °C. After washing twice with ice-  
6 cold PBS, Alexa488 labeled anti-pY142-CD3ζ antibody (BD) was added in a final volume of 100  
7 μl of ice-cold PBS and incubated at 4 °C for 45 min. Cells were washed three time with ice-cold  
8 PBS containing 2% BSA and analyzed by Fortessa flow cytometry. Flow data were further  
9 processed with FlowJo software.

10

11 **Ca<sup>2+</sup> Imaging.** For Ca<sup>2+</sup> flux experiments, T cells (~10<sup>6</sup>) were incubated with 5 μM of fluorescent  
12 dye Fluo-4 AM (Molecular Probe) for 30 min in complete RPMI-1640 medium. All the Fluo-4  
13 loading and imaging experiments were performed in the presence of 2.5 mM probenecid. T cells  
14 were washed twice with minimal imaging media (MIM, colorless RPMI with 5% FCS and 10 mM  
15 HEPES), and then transferred to MIM for 10 min at 37 °C before data collection<sup>45</sup>. For imaging, a  
16 LEITZ DMIRB Leica Microscope was used equipped with a 100× objective and an iXON Ultra  
17 888 EMCCD Camera. Calcium flux imaging acquisition was made with Micromanager software.  
18 For T cell-APC conjugate experiments, CH27 B cells (10<sup>6</sup>) were pulsed with 4 μM of each peptide  
19 for 4 hours at 37 °C, and then washed with MIM. T cells (2 μL) and CH27 B cells (2 μL) were  
20 added into MIM (300 μL) in the cell chamber. Seal the chamber using mineral oil from both sides  
21 to avoid MIM evaporation. Signals from Fluo-4 were collected at intervals of 100 ms for up to ~20  
22 min and post-processed by Fiji.

1       **References (methods)**

2

3       31.    Birnbaum, M. E. *et al.* Deconstructing the peptide-MHC specificity of t cell recognition.  
4            *Cell* **157**, 1073–1087 (2014).

5       32.    Howarth, M. & Ting, A. Y. Imaging proteins in live mammalian cells with biotin ligase  
6            and monovalent streptavidin. *Nat. Protoc.* **3**, 534–545 (2008).

7       33.    Tsumoto, K. *et al.* Highly efficient recovery of functional single-chain Fv fragments from  
8            inclusion bodies overexpressed in Escherichia coli by controlled introduction of oxidizing  
9            reagent - Application to a human single-chain Fv fragment. *J. Immunol. Methods* **219**,  
10           119–129 (1998).

11      34.    Ozaki, C. Y. *et al.* Single Chain Variable Fragments Produced in Escherichia coli against  
12            Heat-Labile and Heat-Stable Toxins from Enterotoxigenic E. coli. *PLoS One* **10**,  
13            e0131484 (2015).

14      35.    Leisegang, M. *et al.* Eradication of large solid tumors by gene therapy with a T-cell  
15            receptor targeting a single cancer-specific point mutation. *Clin. Cancer Res.* **22**, 2734–  
16            2743 (2016).

17      36.    Su, X. *et al.* Phase separation of signaling molecules promotes T cell receptor signal  
18            transduction. *Science* **352**, 595–9 (2016).

19      37.    Matysik, A. & Kraut, R. S. TrackArt: the user friendly interface for single molecule  
20            tracking data analysis and simulation applied to complex diffusion in mica supported lipid  
21            bilayers. *BMC Res. Notes* **7**, 274 (2014).

22      38.    Edelstein, A. D. *et al.* Advanced methods of microscope control using  $\mu$ Manager software.

- 1            *J. Biol. Methods* **1**, 10 (2014).
- 2        39.    Huang, J., Edwards, L. J., Evavold, B. D. & Zhu, C. Kinetics of MHC-CD8 Interaction at  
3            the T Cell Membrane. *J. Immunol.* **179**, 7653–7662 (2007).
- 4        40.    Roy, R., Hohng, S. & Ha, T. A practical guide to single-molecule FRET. *Nat. Methods* **5**,  
5            507–516 (2008).
- 6        41.    Chandler, D. *Introduction to Modern Statistical Mechanics*. Oxford University Press  
7            (1987).
- 8        42.    Tinevez, J. Y. *et al.* TrackMate: An open and extensible platform for single-particle  
9            tracking. *Methods* **115**, 80–90 (2017).
- 10       43.    Krutzik, P. O., Trejo, A., Schulz, K. R. & Nolan, G. P. Phospho Flow Cytometry Methods  
11            for the Analysis of Kinase Signaling in Cell Lines and Primary Human Blood Samples. in  
12            *Methods in molecular biology (Clifton, N.J.)* **699**, 179–202 (2011).
- 13       44.    Dominguez, D. *et al.* Exogenous IL-33 Restores Dendritic Cell Activation and Maturation  
14            in Established Cancer. *J. Immunol.* **198**, 1365–1375 (2017).
- 15       45.    Huse, M. *et al.* Spatial and Temporal Dynamics of T Cell Receptor Signaling with a  
16            Photoactivatable Agonist. *Immunity* **27**, 76–88 (2007).

17

## 1 **Supplementary Information**

### 2 **Supplementary Movie Legends**

3 **Supplementary Movie 1 | Single pMHC molecules diffusion on glass supported lipid bilayer**  
4 | His<sub>12</sub>-K5(Cy3)-IE<sup>k</sup> molecules were attached to Ni<sup>2+</sup>-functionalized glass supported lipid bilayer  
5 at 32 nM. IE<sup>k</sup> pMHC diffusion was imaged by TIRF microscopy with 50 ms exposure at 37 °C.  
6 Shown is a representative video out of eight independent experiments. Tracking paths of single  
7 IE<sup>k</sup> pMHC diffusion on lipid bilayer were shown on right side. The video was set to play at 50  
8 frames/second with a field of view of 30 × 27 μm. Scale bar: 5 μm.

9  
10 **Supplementary Movie 2 | Fluorescence recovery after photobleaching (FRAP) | His<sub>12</sub>-**  
11 **K5(Cy3)-IE<sup>k</sup> molecules were loaded to Ni<sup>2+</sup>-functionalized glass supported lipid bilayer. Time-**  
12 **lapse microscopy experiment showed the entire process of pre-bleaching, bleaching, and post-**  
13 **bleaching recovery. The diffusion of lipid bound protein recovered 60-80% of the intensity at the**  
14 **photo-bleached area. FRAP were imaged by epi-fluorescence microscopy with a 200 ms exposure**  
15 **and 10 second interval for 6.8 min at 37 °C. Shown is a representative video out of seven**  
16 **independent experiments. The video was set to play at 1 frame/second with a field of view of 37**  
17 **× 38 μm. Scale bar: 5 μm.**

18  
19 **Supplementary Movie 3 | Synapse formation | His<sub>12</sub>-K5(Cy3)-IE<sup>k</sup>, His<sub>12</sub>-B7 and His<sub>12</sub>-ICAM**  
20 **molecules were attached to Ni<sup>2+</sup>-functionalized glass supported lipid bilayer. Time series of**  
21 **synapse formation were recorded by epi-fluorescence microscopy with an interval time of 40 ms**  
22 **at 37 °C. Fluorescence (right) and fluorescence overlaid with DIC (left) channels were shown side**  
23 **by side. Shown is a representative video out of 3 independent experiments. The video was set to**  
24 **play at 15 frames/second with a field of view of 37 × 38 μm. Scale bar: 2 μm.**

25  
26 **Supplementary Movie 4 | Single-molecule FRET | His<sub>12</sub>-K5(Cy3)-IE<sup>k</sup>, His<sub>12</sub>-B7 and His<sub>12</sub>-**  
27 **ICAM were attached to Ni<sup>2+</sup>-functionalized glass supported lipid bilayer. TCR was labeled with**  
28 **scFv J1-Cy5. Time series of FRET signals were imaged by TIRF microscopy with an exposure**  
29 **time of 10 ms at 37 °C. Donor and acceptor fluorescence signals were simultaneously recorded by**



1 a same EMCCD. Shown is a representative video out of 10-15 independent experiments. The video  
2 was set to play at 15 frames/second with a field of view of  $37 \times 38 \mu\text{m}$ . Scale bar:  $2 \mu\text{m}$ .

3  
4 **Supplementary Movie 5 | CD3 $\zeta$ -GFP microcluster formation on lipid bilayer** | His<sub>12</sub>-K5-IE<sup>k</sup>,  
5 His<sub>12</sub>-B7 and His<sub>12</sub>-ICAM were attached to Ni<sup>2+</sup>-functionalized glass supported lipid bilayer. Time  
6 series of CD3 $\zeta$ -GFP microcluster formation and diffusion were imaged by epi-fluorescence  
7 microscopy with a 40 ms interval at 37 °C. Shown is a representative video out of 6-8 independent  
8 experiments. The video was set to play at 11 frames/second with a field of view of  $12 \times 14 \mu\text{m}$ .  
9 Scale bar:  $3 \mu\text{m}$ .

10  
11 **Supplementary Movie 6 | CD3 $\zeta$ -GFP microcluster formation on glass surface** | His<sub>12</sub>-K5-IE<sup>k</sup>,  
12 His<sub>12</sub>-B7 and His<sub>12</sub>-ICAM were attached to Ni<sup>2+</sup>-functionalized PEG coated glass. Time series of  
13 CD3 $\zeta$ -GFP microcluster formation and diffusion were imaged by epi-fluorescence microscopy  
14 with a 40 ms interval at 37 °C. Shown is a representative video out of 6-8 independent experiments.  
15 The video was set to play at 11 frames/second with a field of view of  $18 \times 22 \mu\text{m}$ . Scale bar:  $3 \mu\text{m}$ .

16  
17 **Supplementary Movie 7 | TCR microcluster diffusion to the center of synapse on lipid bilayer**  
18 | His<sub>12</sub>-K5-IE<sup>k</sup>, His<sub>12</sub>-B7 and His<sub>12</sub>-ICAM were attached to Ni<sup>2+</sup>-functionalized glass supported  
19 lipid bilayer. TCRs were labeled with Alexa568-scFv J3. TCR microcluster formation and  
20 diffusion to the center of synapse was imaged by epi-fluorescence microscopy with an interval  
21 time of 255 ms at 37 °C. Shown is a representative video out of 6-8 independent experiments. The  
22 video was set to play at 51 frames/second with a field of view of  $63 \times 63 \mu\text{m}$ . Scale bar:  $10 \mu\text{m}$ .

23  
24 **Supplementary Movie 8 | Measuring *in situ* kinetics and affinity of TCR-pMHC interactions**  
25 **by 2D micropipette adhesion assay** | Biotin pMHCs were coated onto red blood cell (RBC)  
26 surface at an optimal ligand density. A 5C.C7 transgenic T cell and a pMHC coated RBC were  
27 brought in and out for 50 times to observe the adhesion frequency at a pre-defined contact duration  
28 at 25 °C. The RBC acts as an adhesion sensor by stretching its membrane in response to the force  
29 (if adhesion is present) when the T cell is retracted, enabling visualization of adhesion. Scale bar:  
30  $10 \mu\text{m}$ .

31

1        **Supplementary Movie 9 | Single-cell Ca<sup>2+</sup> Imaging** | Peptides (K5, MCC, 102S and Null) were  
2        loaded onto CH27 cells (APC) surface at 4  $\mu\text{mol}$  concentration. T cells were loaded with Fluo-4  
3        Ca<sup>2+</sup> sensor dye for 30 mins at 37 °C. The APC and the T cell were brought into contact, and the  
4        real-time Ca<sup>2+</sup> flux was imaged by epifluorescence microscopy at an interval of 87 ms at 37 °C.  
5        Shown is a representative video out of 3-5 independent experiments for each pMHC (K5, MCC,  
6        102S and null). The video was set to play at 15 frames/second with a field of view of  $61 \times 104$   
7         $\mu\text{m}$  for each pMHC. Scale bar: 5  $\mu\text{m}$ .

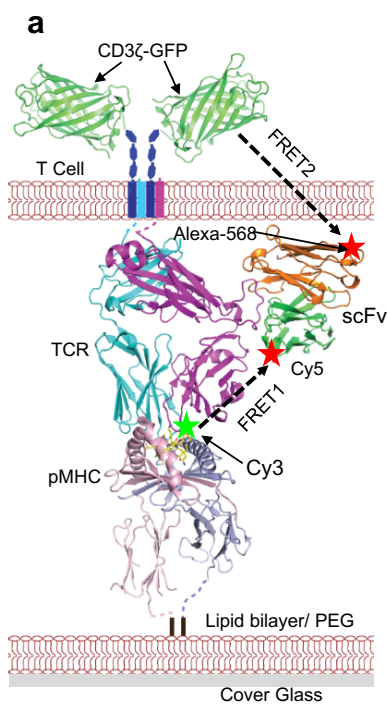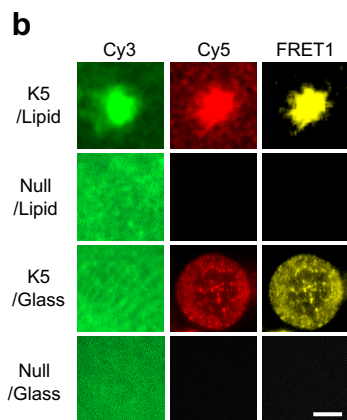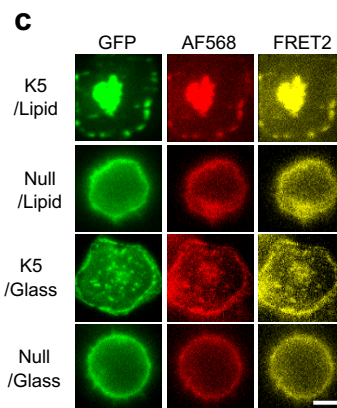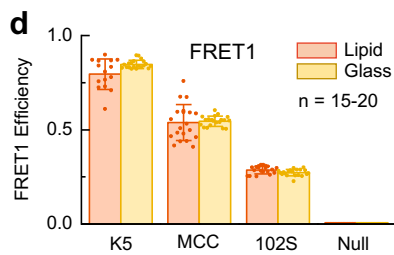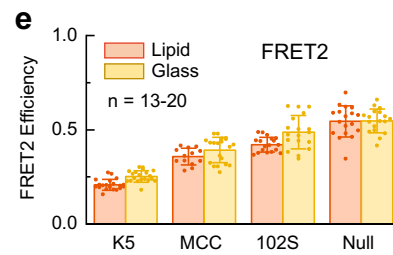

**Fig. 1 | Measurement of TCR conformational dynamics by FRET.** **a**, A composite structural model of TCR, pMHC, scFv and CD3 $\zeta$ -GFP. For measuring TCR-pMHC bond conformational dynamics, the TCR was labeled by a Cy5 via a scFv J1 and the peptide was labeled by a Cy3. For determining TCR-CD3 $\zeta$  conformational changes, the TCR was labeled by an Alexa568 via a scFv J3 and the CD3 $\zeta$  was tagged by a GFP. Extracellular Cy3/Cy5 FRET1 and transmembrane GFP/Alexa568 FRET2 were indicated by dashed lines. All pMHCs were anchored on either lipid bilayer or PEG-Ni<sup>2+</sup> glass surface (Extended Data Fig. 1). Note: J1 and J3 are different scFvs and each only has a unique labeling site. **b-c**, Donor, acceptor and FRET signals of TCRs interacting with K5 or Null pMHC on lipid bilayer or glass surface. Shown were representative data of 3-5 independent experiments for each peptide at 37 °C. Scale bar is 5  $\mu$ m. **d-e**, FRET efficiencies measured for K5, MCC, 102S and null pMHCs on lipid bilayer (red) and glass surface (yellow). At least 13 cells were used for determining the FRET efficiency for each pMHC. Also see Extended Data Fig. 1-4 and Supplementary Movie 1-3.

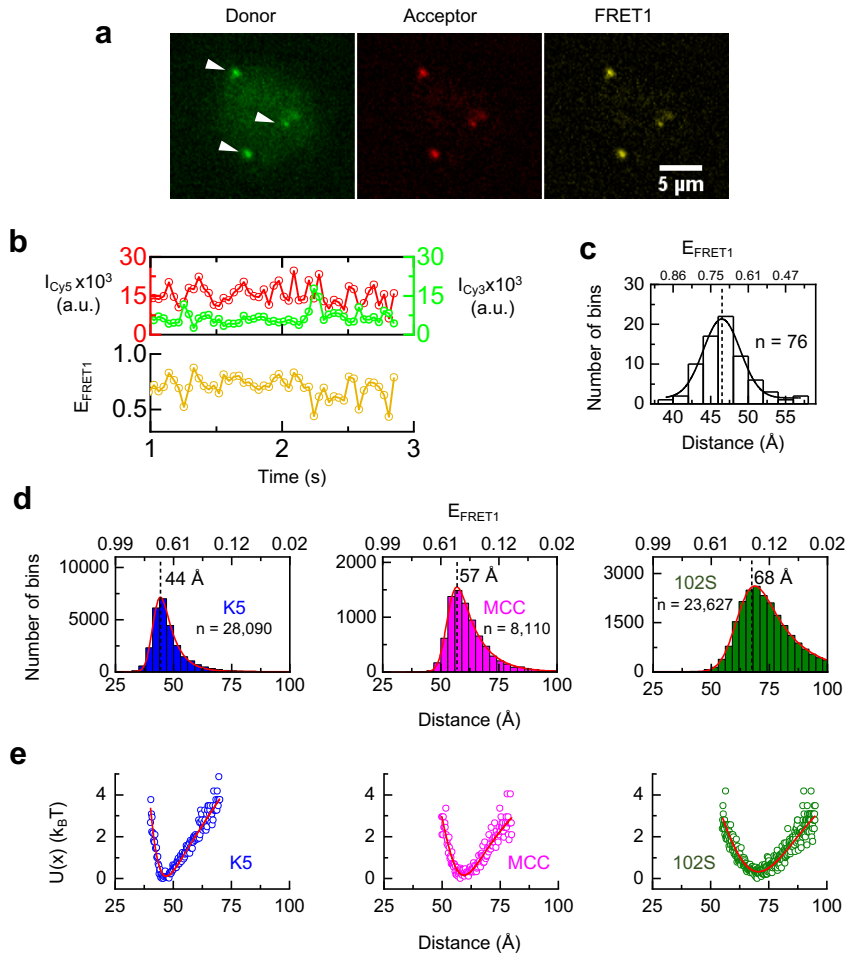

**Fig. 2 | Single TCR-pMHC bond length and conformational dynamics.** **a**, A representative smFRET event mediated by the interaction between a TCR and a K5 pMHC. Shown were the donor, acceptor, and FRET signals and white arrows indicated single molecules. **b**, Single-molecule time trajectories of the donor (green, Cy3-pMHC) and the acceptor (red, Cy5-TCR) intensities (upper panel) and the corresponding time trajectory of smFRET efficiency (yellow, lower panel). Also see Extended Data Fig. 7. **c**, Histogram of the Cy3-Cy5 distances (pseudo bond length) calculated from smFRET efficiencies from Fig. 2b (lower panel) and fitted with a Gaussian distribution (black curve). Also see Extended Data Fig. 6a. **d**, Histograms of pseudo TCR-pMHC bond lengths for K5, MCC and 102S pMHCs. Each histogram used 8,000-28,000 bond lengths to identify the most probable bond length for each peptide. Also see Extended Data Fig. 6-8 and Supplementary Movie 4. **e**, Potential-of-mean-force (PMF) of a TCR interacting with K5, MCC and 102S pMHCs, respectively.

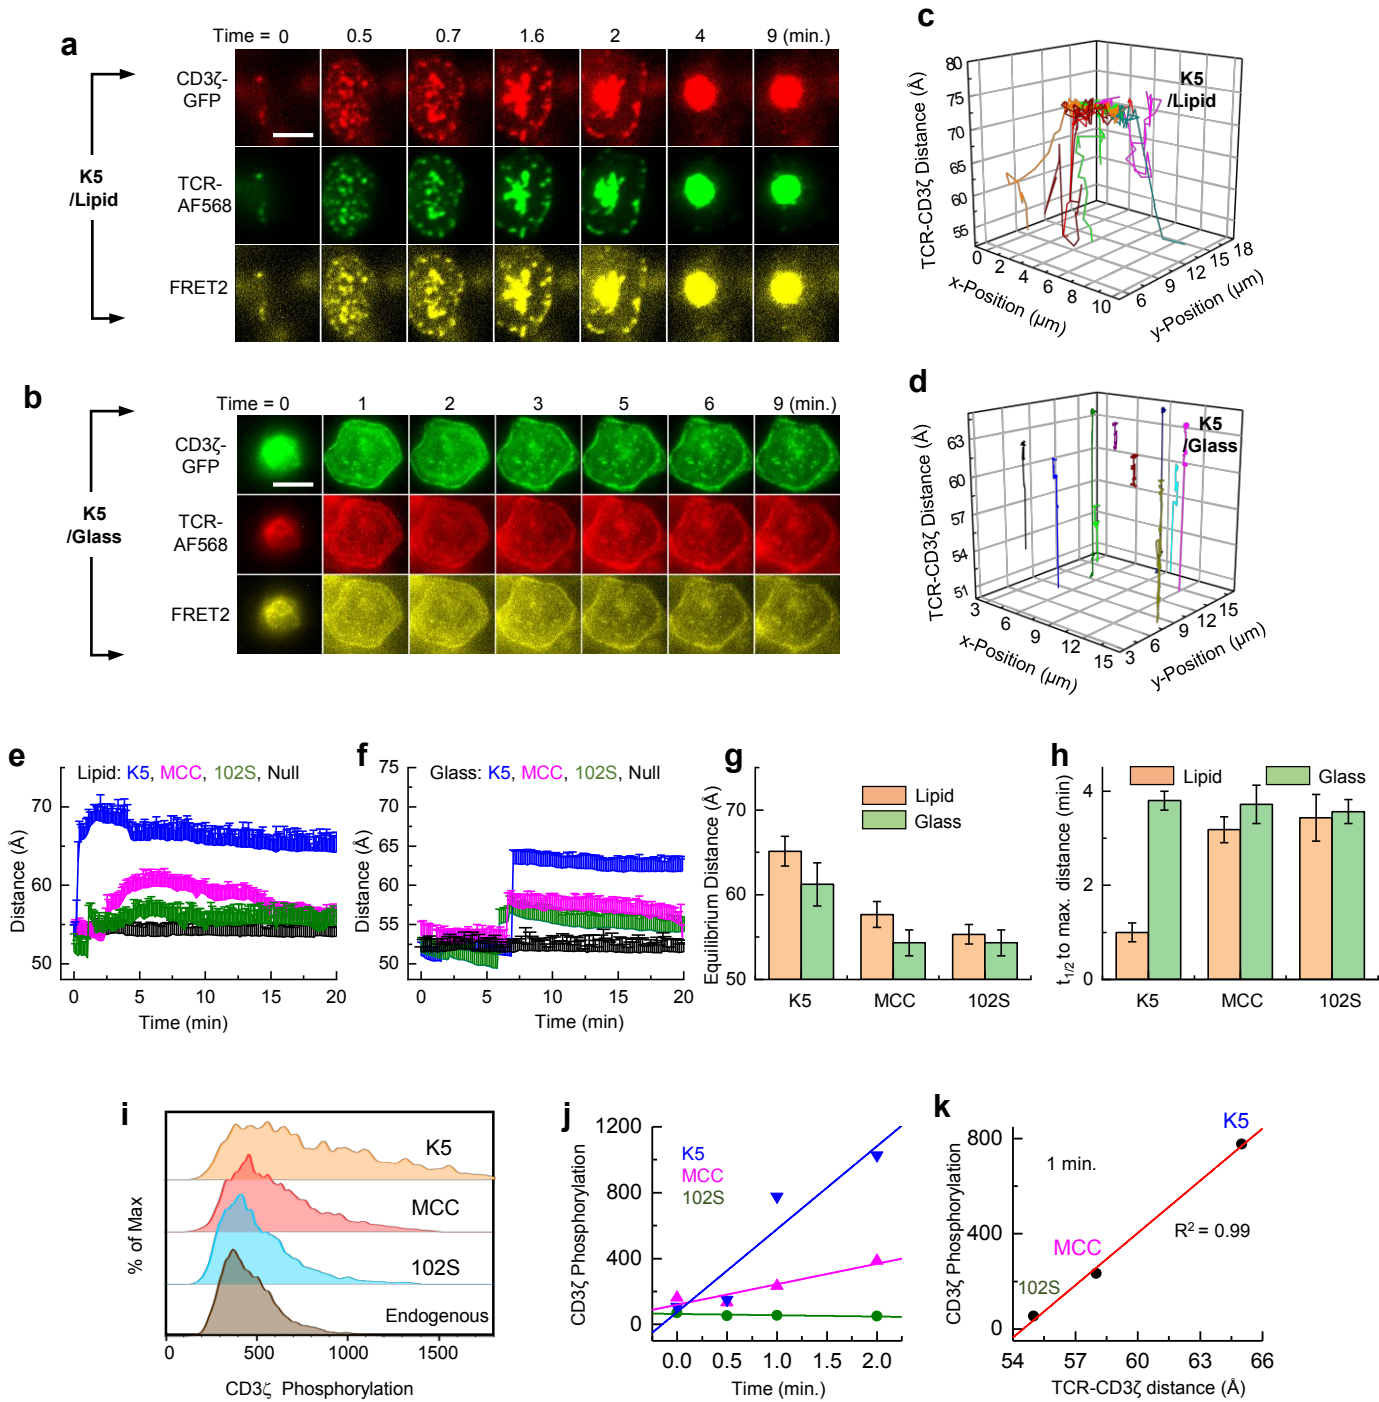

**Fig. 3 | TCR-CD3 $\zeta$  conformational changes induced by TCR ligation.** **a-b**, Representative real-time CD3 $\zeta$ -GFP (green, donor), TCR-Alexa568 (red, acceptor), and FRET (yellow) signals in a typical transmembrane FRET experiment on lipid bilayer (**a**) or glass surface (**b**) at 37 °C for K5 pMHC. 6-8 independent experiments were repeated for each pMHC on both lipid and glass surface. Scale bar = 5  $\mu$ m. **c-d**, 3D illustration of the lateral movement (x-y) and intramolecular distance change (z) between TCR and CD3 $\zeta$  of individual TCR/CD3 $\zeta$  microclusters shown in Fig. 3a on the lipid bilayer (**c**) and Fig. 3b on the glass surface (**d**). Also see Supplementary Movie 5-7 for microcluster formation, Extended Data Fig. 9-11 for data analysis, Extended Data Fig. 12 for data calibration and Extended Data Fig. 13 for negative controls. **e-f**, Time-dependent TCR-CD3 $\zeta$  intramolecular distance changes on lipid bilayer (**e**) and glass surface (**f**) upon TCR ligation with K5, MCC, 102S or null pMHC. Each curve showed the average intramolecular distances at consecutive time points from three independent measurements. **g**, The equilibrium intramolecular TCR-CD3 $\zeta$  distances induced by different pMHCs on lipid bilayer and glass surface. **h**, The half time ( $t_{1/2}$ ) to reach the maximum TCR-CD3 $\zeta$  distance for different pMHCs on lipid bilayer and glass surface. **i**, Phospho flow showing the phosphorylation of CD3 $\zeta$  in T cells upon contacting antigen-presenting cells loaded with 102S, MCC or K5 peptides for 1 minute. **j**, The time course of CD3 $\zeta$  phosphorylation upon stimulation. **k**, Correlation between CD3 $\zeta$  phosphorylation (1 min stimulation) and TCR-CD3 $\zeta$  distance.



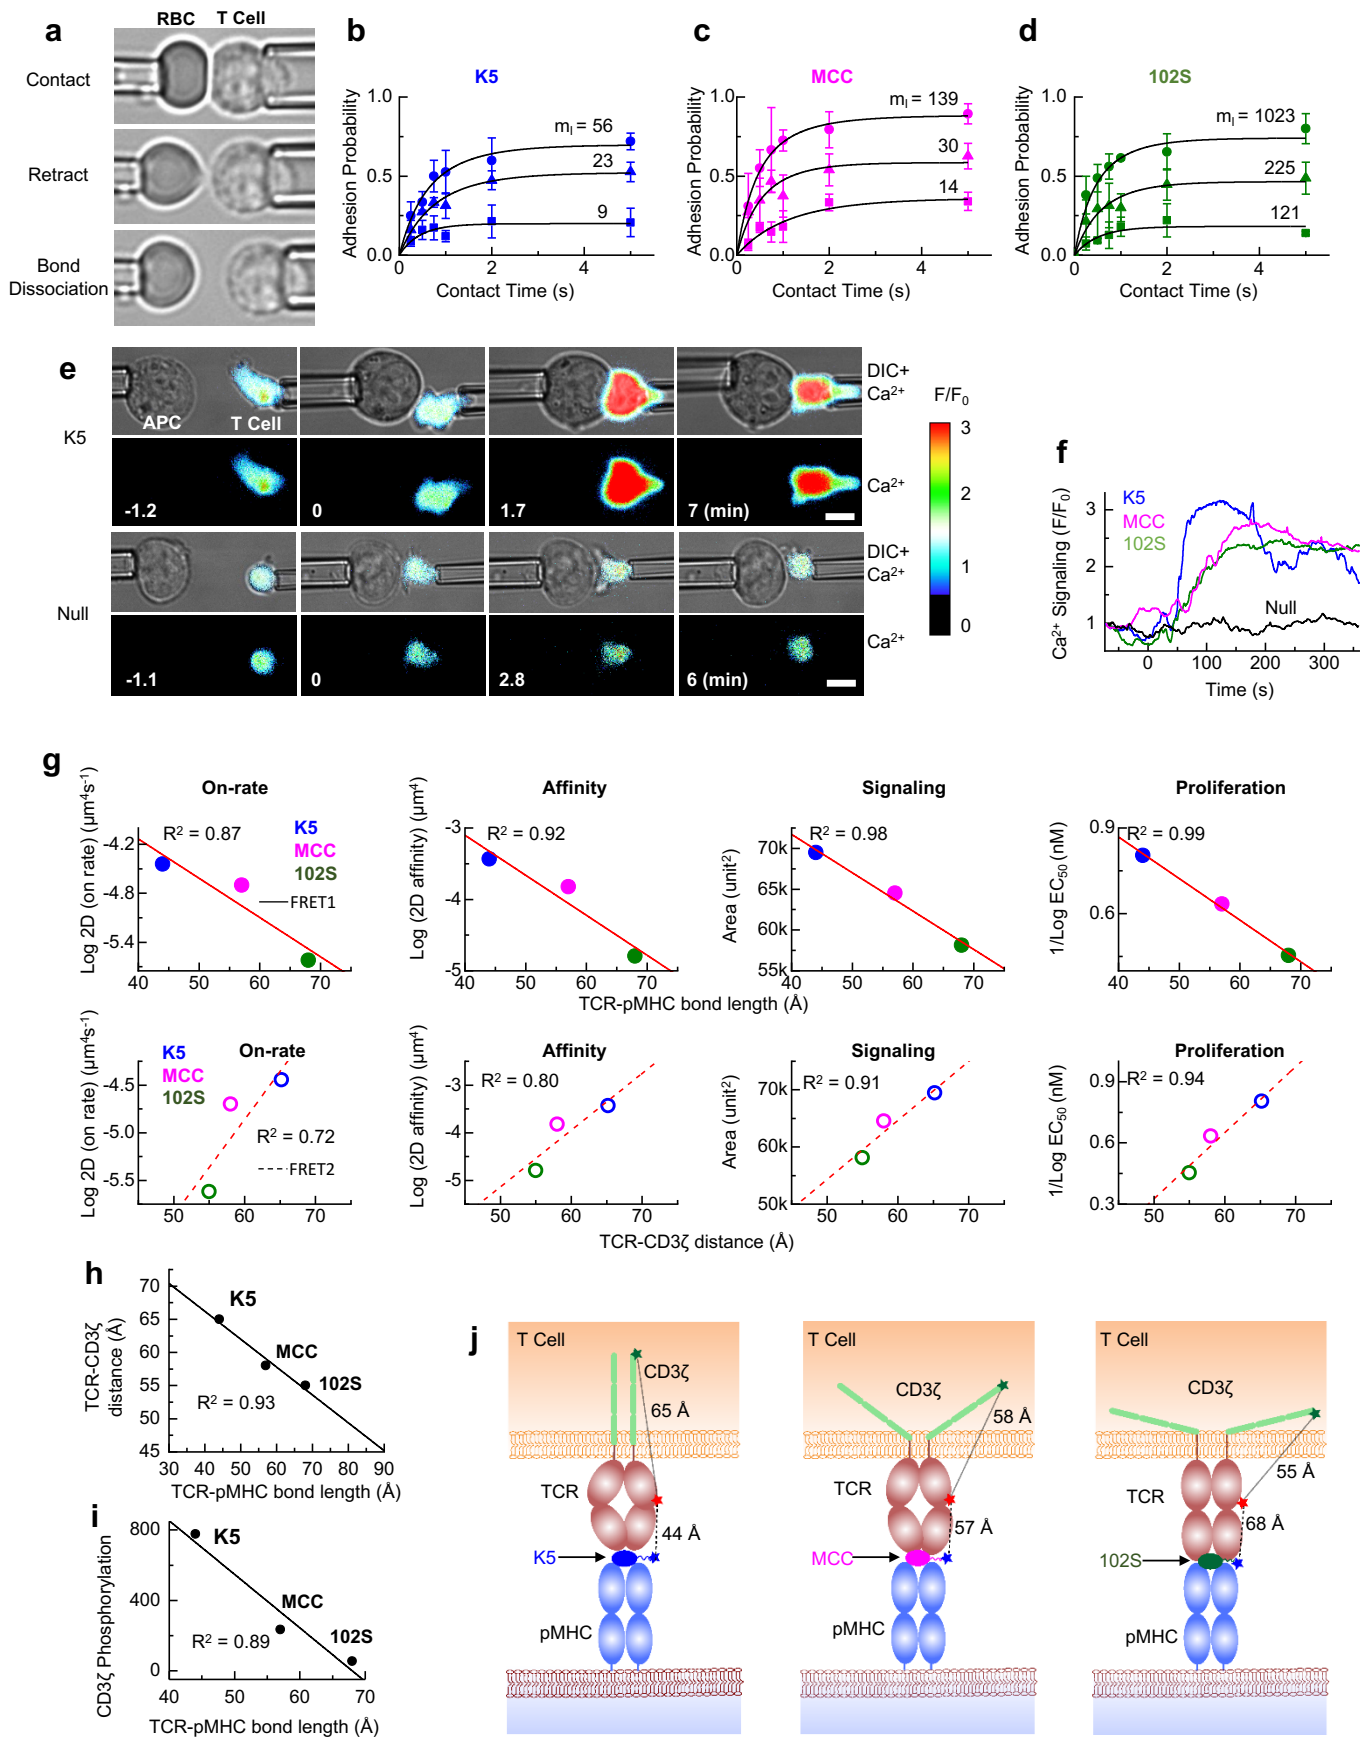

**Fig. 4 | Correlations between TCR conformations and T-cell binding kinetics, signaling and proliferation.** **a**, 2D micropipette adhesion frequency assay. A micropipette-aspirated T cell (right) was driven by a piezoelectric translator to make a controlled contact with a RBC coated with pMHC held by another pipette (left). The retraction of T cell to the starting position resulted in elongation of the RBC, enabling visual detection of a TCR-pMHC bond. Also see Extended Data Fig. 1b-c. **b-d**, Adhesion curves for the 5C.C7 TCRs interacting with K5 (**b**), MCC (**c**) and 102S (**d**) pMHCs measured by micropipette at 25 °C at indicated pMHC site densities. Each cell pair was tested fifty times at a given contact duration to estimate an adhesion probability, and 3 cell pairs were tested for each contact duration to calculate a mean adhesion probability. The data (points) were fitted by a probabilistic kinetic model (curves) to determine 2D binding kinetics. Data were summarized in Table 1 and Extended Data Table 1. **e**, Real-time single T-cell calcium signaling measured by fluorescent micropipette. A CH27 cell loaded with K5 (top row) or null peptide (bottom row, control) was precisely controlled to contact a primary 5C.C7 T cell loaded with Fluo-4 calcium indicator at 37 °C . The fluorescence signal was real-time recorded by time-lapse microscopy and the fold-increase of  $\text{Ca}^{2+}$  signaling ( $F/F_0$ ) was shown by pseudo color. Shown were representative  $\text{Ca}^{2+}$  imaging experiments for K5 and null peptides out of 6-8 independent experiments for each peptide. Also see Extended Data Fig. 14 for peptides MCC and 102S. See Supplementary Movie 9 for more data. **f**, Representative time trajectories of  $\text{Ca}^{2+}$  signaling stimulated by K5, MCC, 102S and null peptides. Fluorescent intensity values ( $F$ ) at any given time were divided by the initial fluorescent intensity value at time zero ( $F_0$ ) to obtain the fold-increase of  $\text{Ca}^{2+}$  signaling after cell contact. **g**, Correlations of TCR-pMHC bond length (top row) and TCR-CD3 $\zeta$  distance (bottom row) with 2D on-rate, 2D affinity, calcium signaling and proliferation for K5, MCC and 102S peptides.  $\text{EC}_{50}$  data of cell proliferation were adapted from Corse et al. 2010. Data points were fitted with a linear function and the goodness of correlation was indicated by  $R^2$  values. **h**, Correlation between TCR-pMHC bond length and TCR-CD3 $\zeta$  distance. **i**, Correlation between TCR-pMHC bond length and CD3 $\zeta$  phosphorylation. **j**, Our proposed bond length model for TCR recognition. The TCR-pMHC bond length controls TCR-CD3 distance to regulate the exposure of ITAMs on CD3 $\zeta$  available for subsequent phosphorylation.

**Table 1 | 2D kinetic parameters**

| Peptide | Sequence              | T cell activation | $A_c K_a$ ( $\mu\text{m}^4$ ) | $k_r$ ( $\text{s}^{-1}$ ) | $A_c K_{\text{on}}$ ( $\mu\text{m}^4\text{s}^{-1}$ ) |
|---------|-----------------------|-------------------|-------------------------------|---------------------------|------------------------------------------------------|
| K5      | ANERADLIA<br>YFKAATKF | Super Agonist     | $3.7 \pm 0.6 \times 10^{-4}$  | $1.0 \pm 0.3$             | $3.6 \pm 0.5 \times 10^{-5}$                         |
| MCC     | ANERADLIA<br>YLKQATK  | Agonist           | $1.5 \pm 0.7 \times 10^{-4}$  | $1.3 \pm 0.7$             | $2.0 \pm 1.1 \times 10^{-5}$                         |
| 102S    | ANERADLIA<br>YLKQASK  | Weak Agonist      | $1.6 \pm 0.7 \times 10^{-5}$  | $1.5 \pm 0.3$             | $2.4 \pm 0.8 \times 10^{-6}$                         |

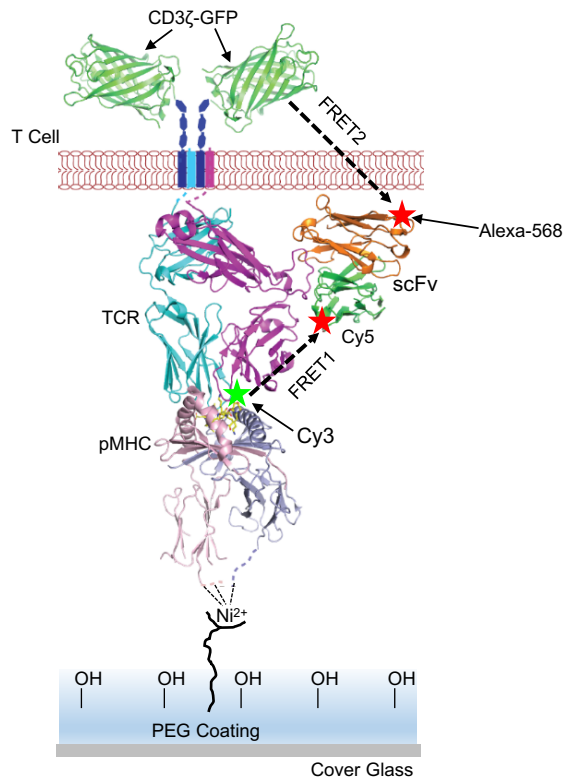

**Extended Data Fig. 1 | FRET on glass surface.** His-tagged pMHCs and accessory molecules ICAM-1 and B7.1 were anchored on the PEG-Ni<sup>2+</sup> glass surface to perform cell surface FRET (FRET1) and transmembrane FRET (FRET2) experiments. Also see Fig. 1a when pMHCs and accessory molecules were anchored on lipid bilayer.

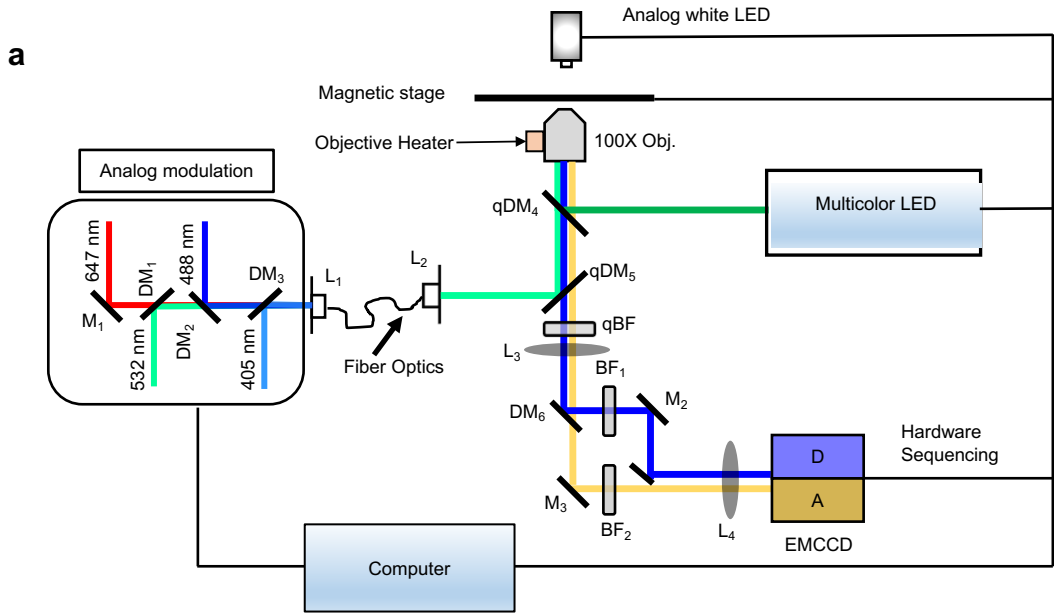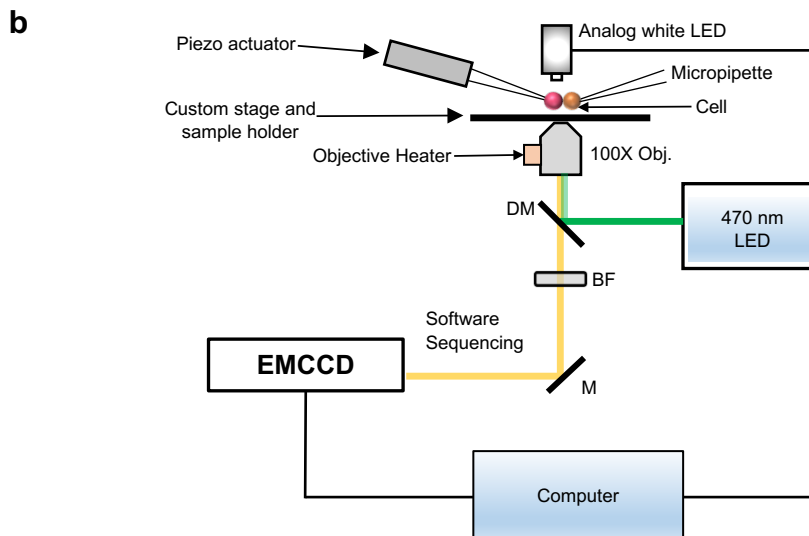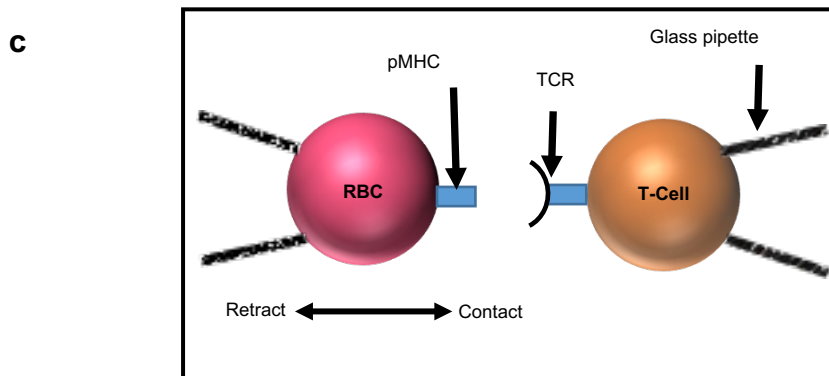

**Extended Data Fig. 2 | Schematics of fluorescence microscopes.** **a**, The diagram illustration of a dual-function TIRF and epi-fluorescence microscope. DM: Dichroic mirror; qDM: quad-band dichroic mirror; L: Lens; qBF: Quad band pass filter, and M: mirror. **b**, Fluorescence micropipette for measuring 2D binding kinetics and real-time  $\text{Ca}^{2+}$  signaling. **c**, Cartoon illustration of 2D kinetic measurements of TCR-pMHC interactions at the cell membrane.

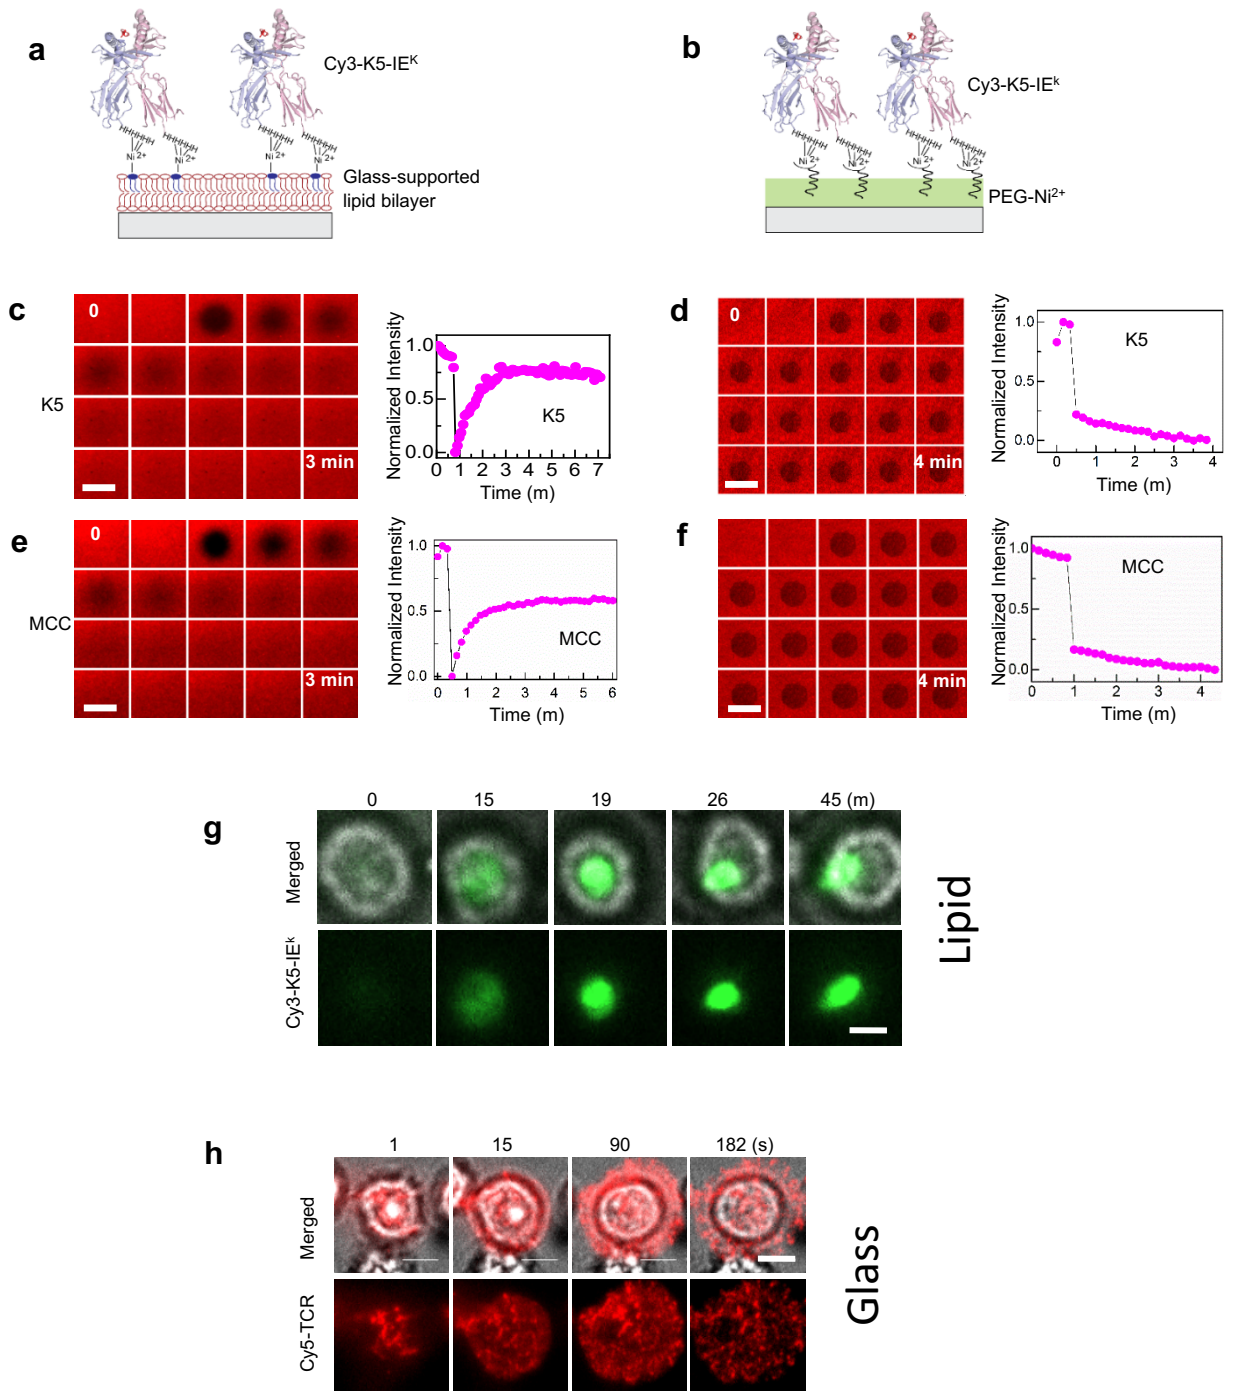

**Extended Data Fig. 3 | Functionalized lipid bilayer and glass surface.** **a-b**, Cy3-labeled His<sub>12</sub>-K5-IE<sup>k</sup> pMHCs were attached to Ni<sup>2+</sup>-functionalized glass supported lipid bilayer (a) and PEG-Ni<sup>2+</sup> modified glass surface (b). **c-f**, Representative real-time fluorescence recovery after photobleaching (FRAP) images and corresponding time trajectories of fluorescent intensity for Cy3-labelled His<sub>12</sub>-K5-IE<sup>k</sup> and His<sub>12</sub>-MCC-IE<sup>k</sup> pMHCs attached on the lipid bilayer (c and e) and the PEG-Ni<sup>2+</sup> modified glass surface (d and f). Three independent experiments were repeated for each pMHC at 37 °C. Fluorescence recovery confirmed the fluidity and integrity of lipid bilayer. No recovery was observed on glass surface. Also see Supplementary Movie 2. Scale bar: 10 μm. **g-h**, Immunological synapse formation on the lipid bilayer (g) and TCR microcluster formation on the PEG-Ni<sup>2+</sup> glass surface (h). TCRs were labelled with Cy5 and pMHCs were labelled with Cy3. Also see Supplementary Movie 3.



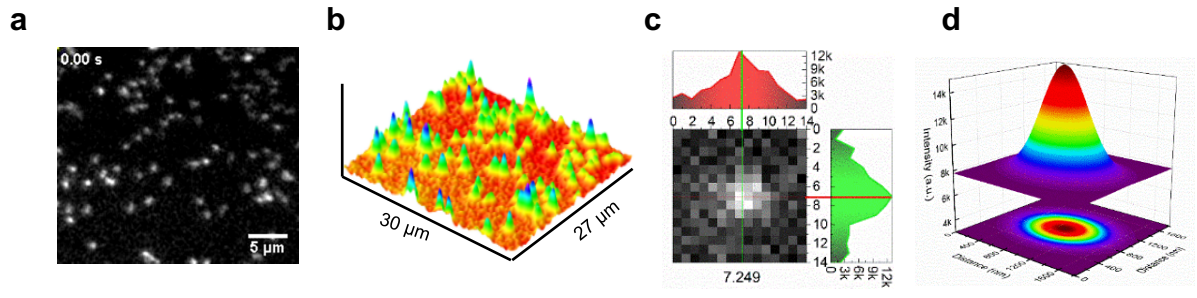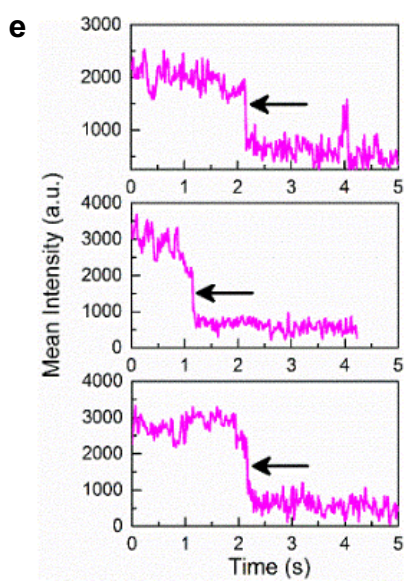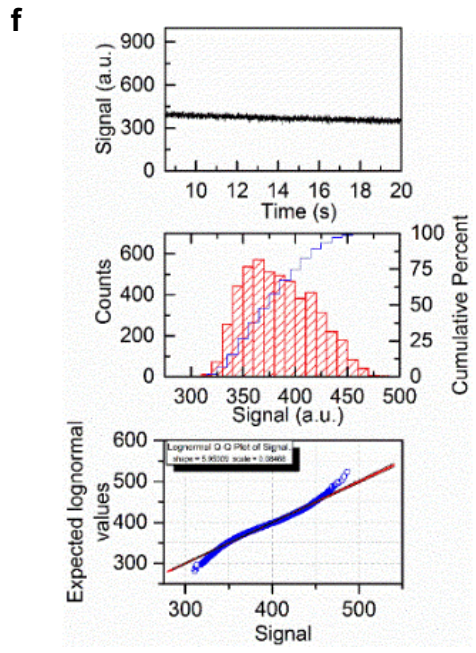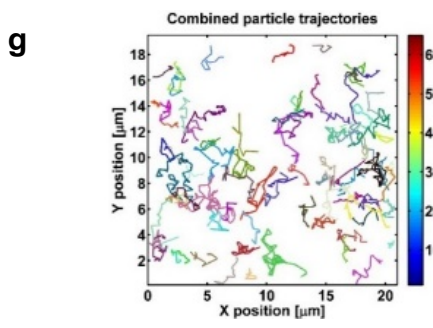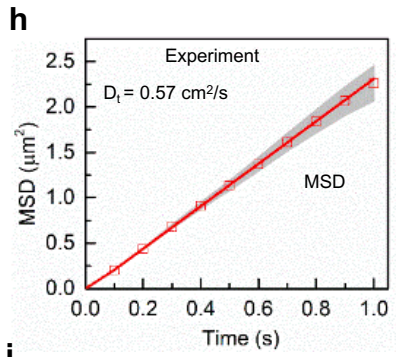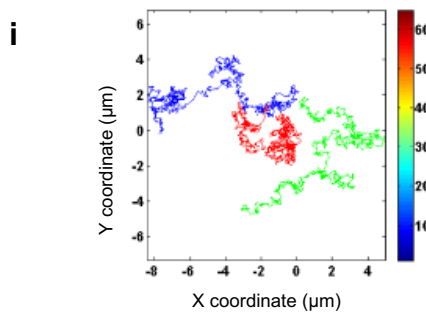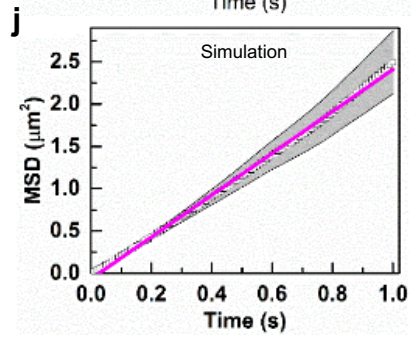

**Extended Data Fig. 4 | Single-molecule quantification of IE<sup>K</sup> pMHCs on lipid bilayer.** **a**, A representative TIRF image of single Cy3-labelled His<sub>12</sub>-K5-IE<sup>k</sup> pMHCs on mobile lipid bilayer. Each white spot represents a single fluorescent pMHC. **b**, 3D fluorescence intensity profiles of single pMHCs shown in a. **c**, A representative 2D intensity profile of a single pMHC. **d**, The same molecule in c was fitted with a 3D Gaussian function to determine the full width at half maximum (FWHM), a value of 263 nm. This was comparable to the diffraction limit spot size (187 nm) for the 532-nm excitation laser. **e**, Single-step photobleaching confirmed the detection of single pMHCs on lipid bilayer. Representative single-step bleaching of three single Cy3-labelled His<sub>12</sub>-K5-IE<sup>k</sup> pMHC molecules. **f**, The stability test of the 532-nm laser by examining the intensity profile of a standard fluorescence bead under continuous illumination. **g-h**, The diffusion of single pMHCs on lipid bilayer was tracked by a Fiji plugin TrackMate software (g) and the diffusion was quantified by a mean-square distance (MSD) plot (h). Also see Supplementary Movie 1. **i-j**, In silico simulated pMHC diffusion on lipid bilayer using a TrackArt program and the resulted MSD plot. The diffusion coefficients obtained from experiments and simulation were  $0.57 \pm 0.06$  and  $0.59 \pm 0.09$   $\mu\text{m}^2/\text{s}$ , respectively.

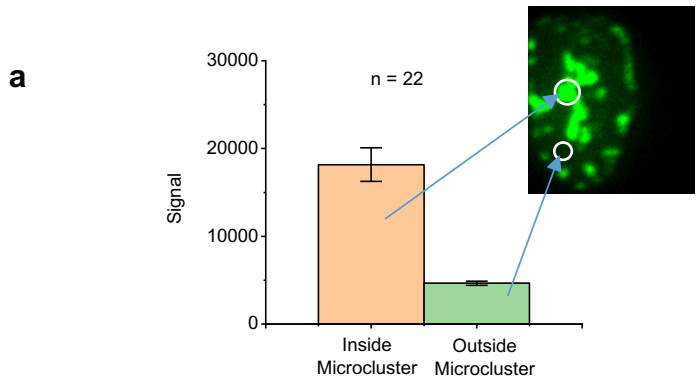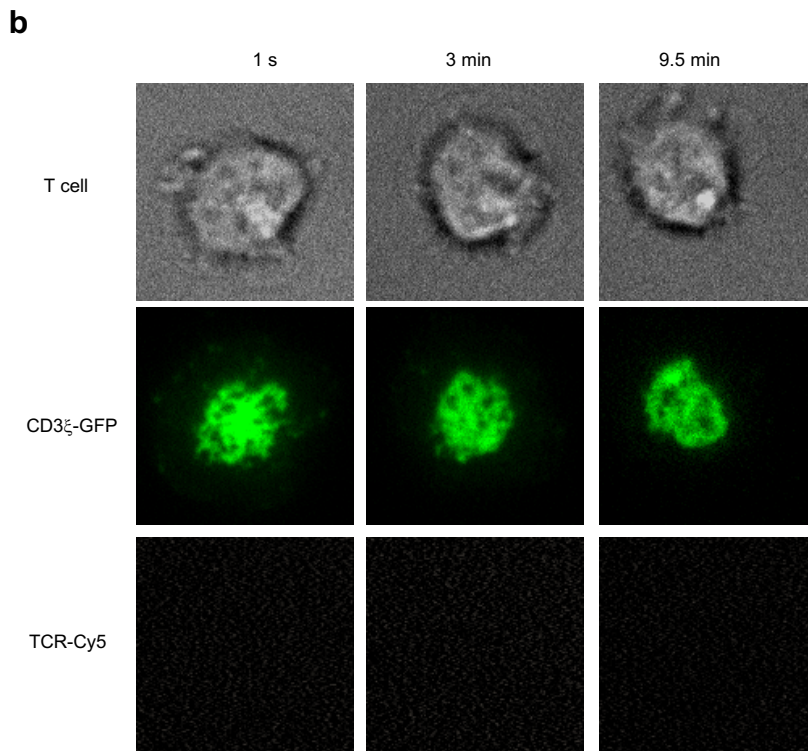

**Extended Data Fig. 5 | Transmembrane FRET is specific to GFP/Alexa568 FRET**

**pair. a**, Microclusters are signaling hotspot. CD3 $\zeta$ -GFP signals inside and outside of the microclusters. **b**, No FRET is detected when Alexa568 is replaced by Cy5. A 470-nm LED light was used to excite GFP and measure GFP/Alexa568 FRET.

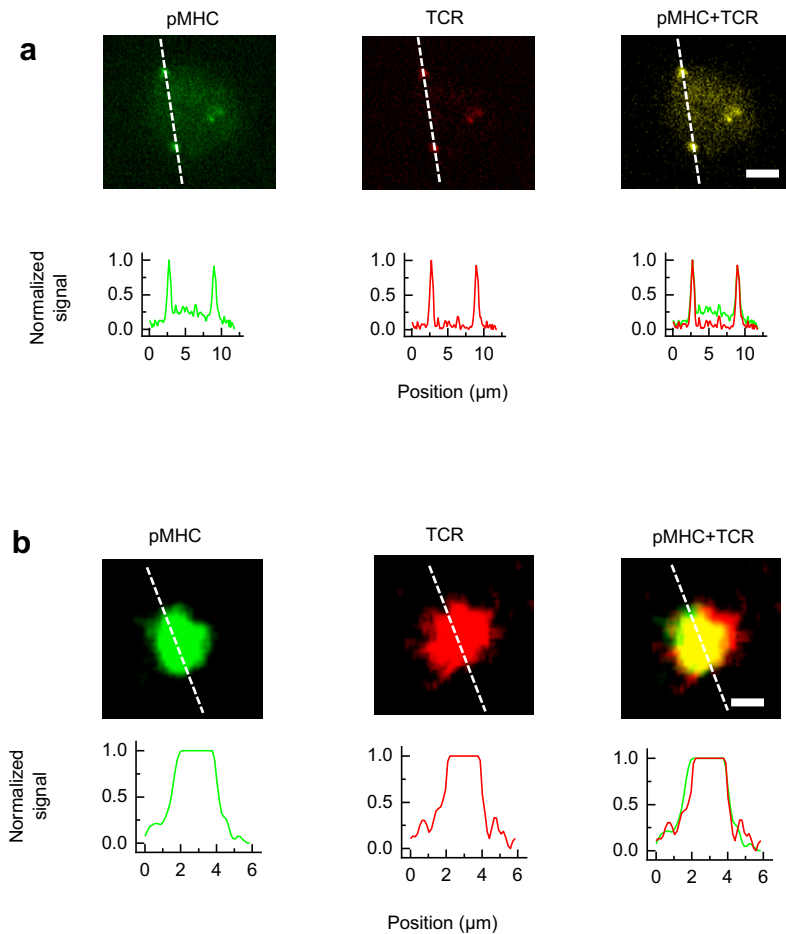

**Extended Data Fig. 6 | Co-localization between TCRs and pMHCs on lipid bilayer.** Representative co-localization between TCR(s) and pMHC(s) in single-molecule **(a)** and ensemble **(b)** FRET experiments. Line scan was used to indicate the fluorescence profile and co-localization for both single-molecule **(a)** and ensemble **(b)** FRET. Scale bar is 5  $\mu\text{m}$ .

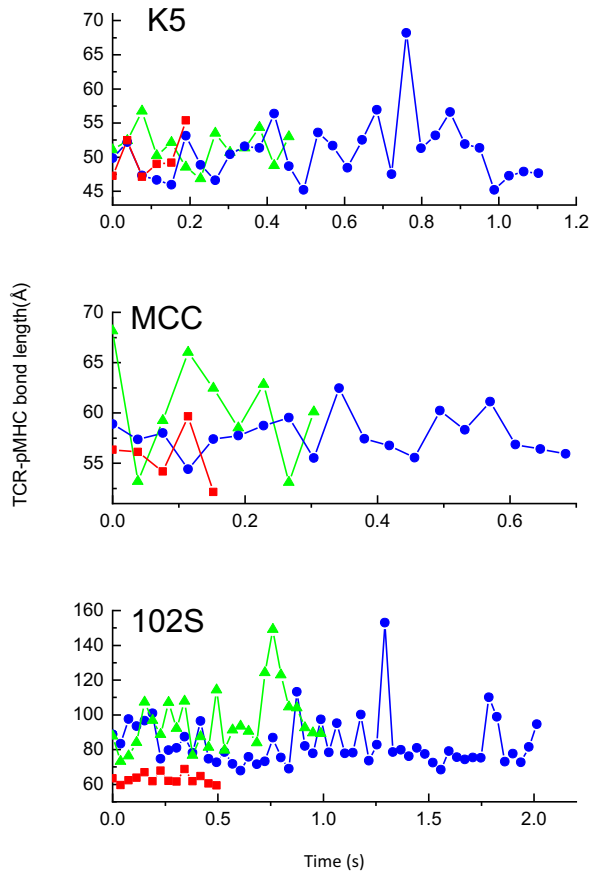

**Extended Data Fig. 7 | Representative bond length trajectories for K5, MCC and 102S pMHCs.** For each peptide, three trajectories with long (blue), medium (green) and short (red) bond lifetimes were randomly chosen as demonstration. Note: the x- and y-axes are different for each peptide.

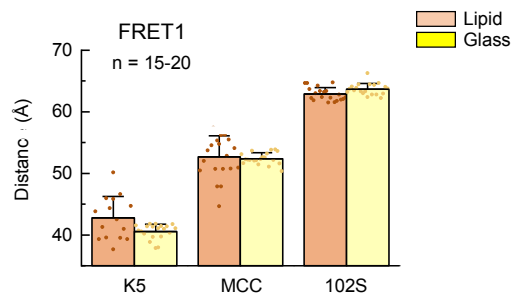

**Extended Data Fig. 8 | TCR-pMHC bond length measurements by ensemble FRET.** The average bond lengths for K5, MCC and 102S pMHCs after ligation with 5C.C7 TCRs on a lipid bilayer and a glass surface.

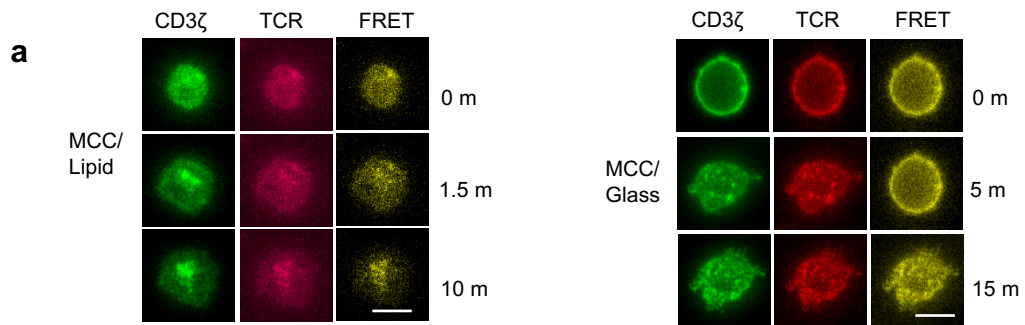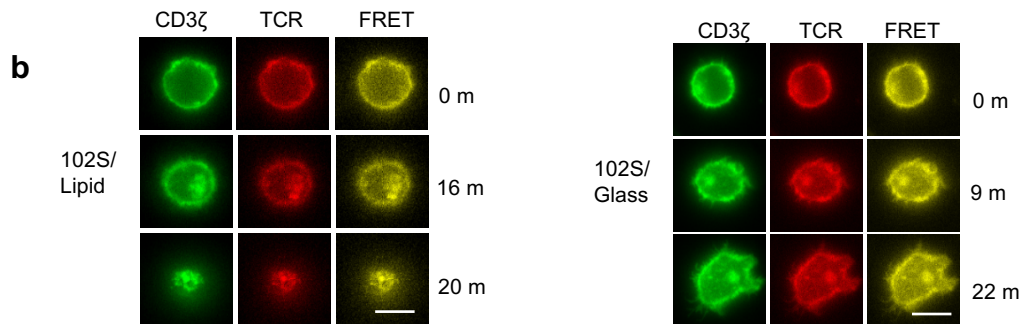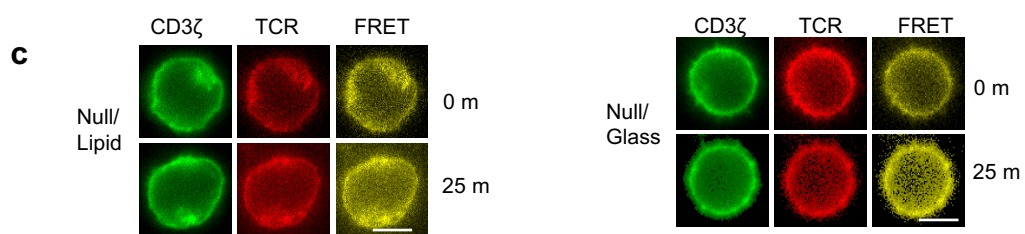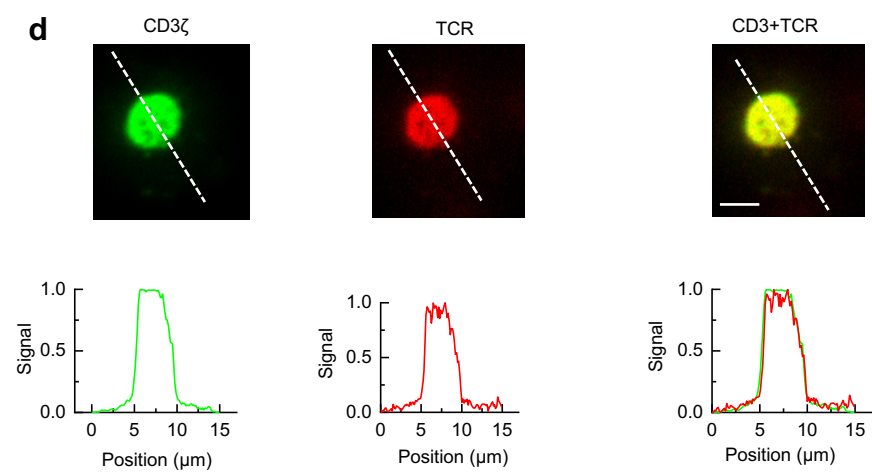

**Extended Data Fig. 9 | Transmembrane FRET measurements for MCC, 102S and Null pMHCs.** **a-c**, Representative transmembrane FRET measurements between CD3 $\zeta$ -GFP and TCR-Alexa568 on lipid bilayer (left) and glass surface (right) for MCC (**a**), 102S (**b**) and Null (**c**). Scale bar is 7  $\mu$ m. **d**, Line scanning of CD3 $\zeta$ , TCR and FRET channels for K5 pMHC after forming a stable immunological synapse on lipid bilayer. Scale bar is 5  $\mu$ m.



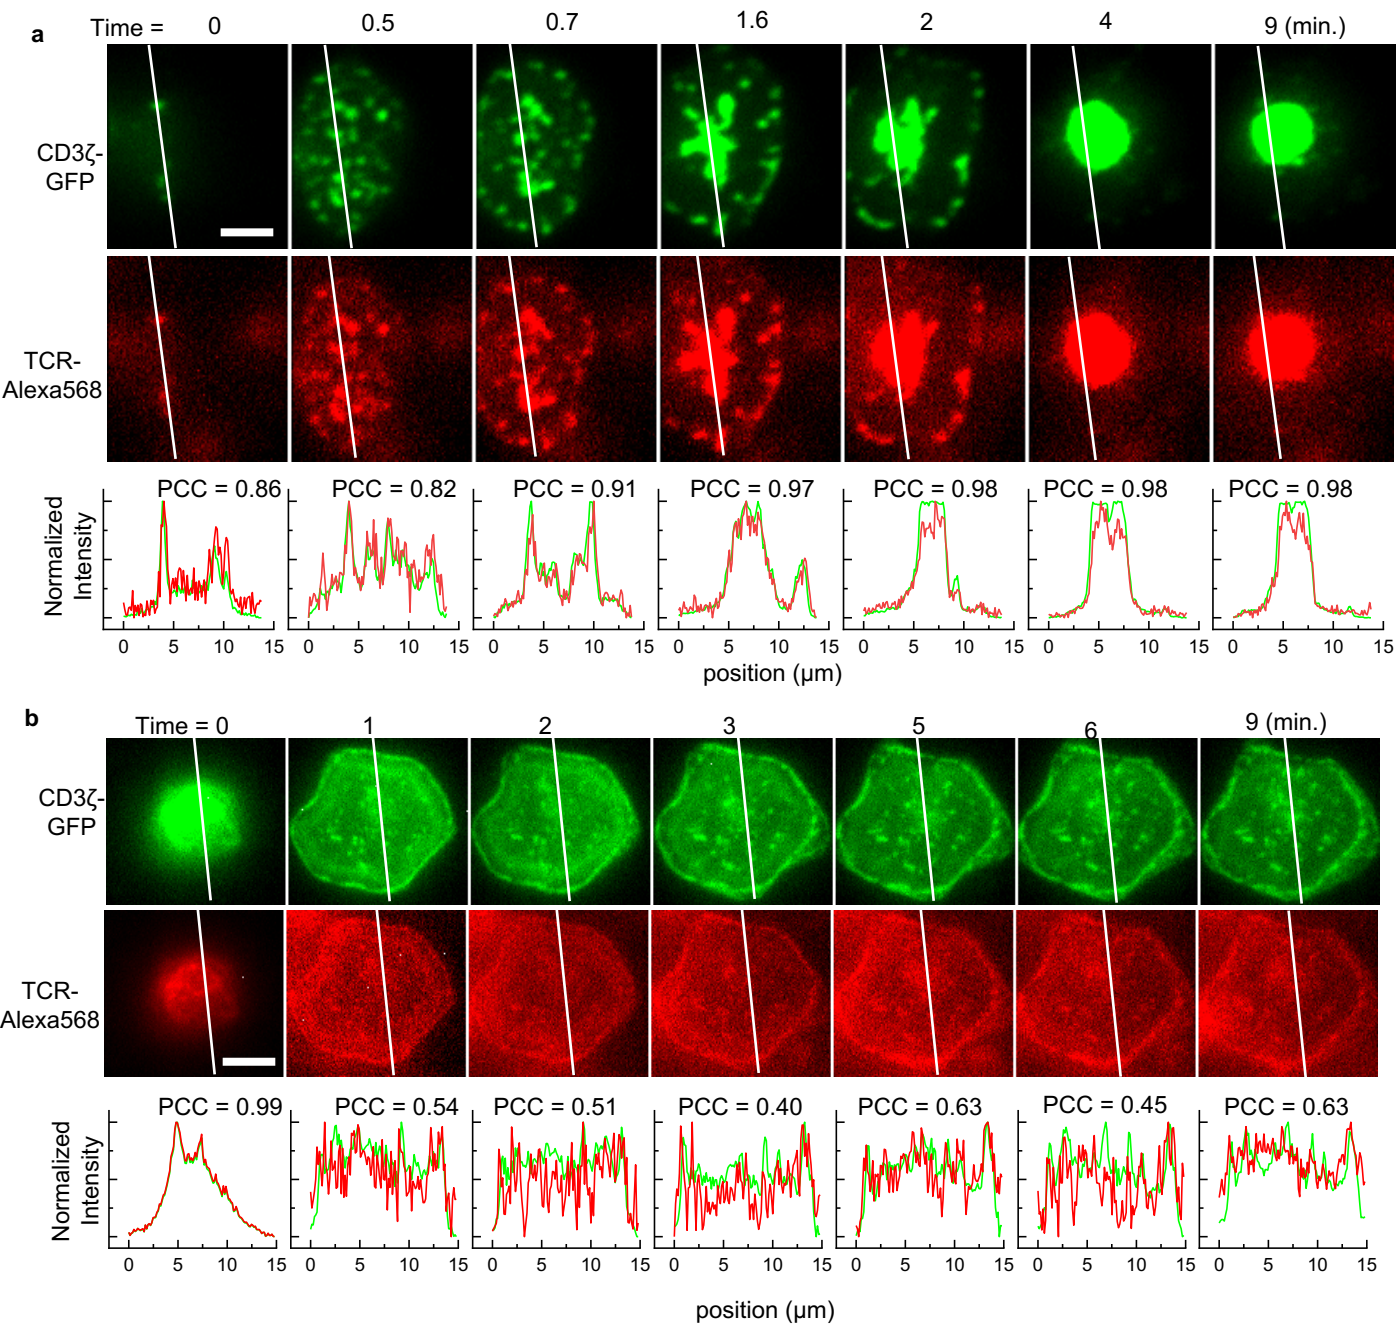

**Extended Data Fig. 10 | Colocalization of TCR and CD3 $\zeta$  on lipid bilayer and glass surface.**

Time series of line scanning intensity profile for TCR and CD3 $\zeta$  on lipid bilayer **(a)** and glass surface **(b)**. The colocalization between TCR and CD3 $\zeta$  was quantified by Pearson correlation coefficient (PCC). The average PCC values are  $0.93 \pm 0.07$  and  $0.59 \pm 0.19$  on lipid bilayer and glass surface, respectively. Scale bar is 5  $\mu\text{m}$ .

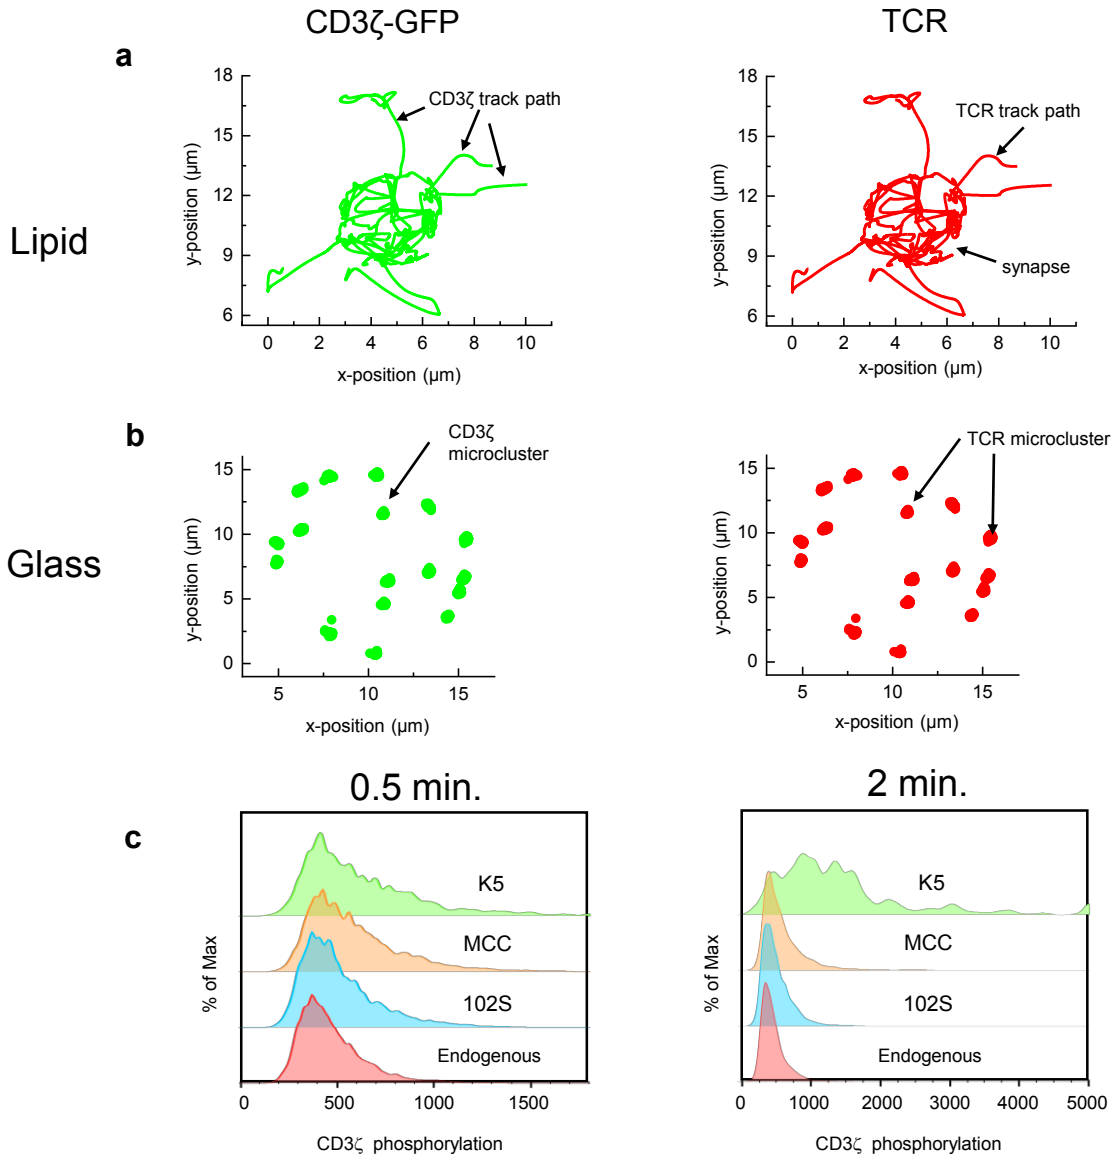

**Extended Data Fig. 11 | 2D tracking of TCR and CD3 $\zeta$  microclusters. a-b,** Real-time tracking of CD3 $\zeta$  (green) and TCR (red) microclusters on lipid bilayer **(a)** and glass surface **(b)** during transmembrane FRET experiments. Also see Supplementary Movie 5-7. **c,** Phospho-flow showing the phosphorylation of CD3 $\zeta$  in T cells upon contacting antigen-presenting cells loaded with 102S, MCC or K5 peptides for 0.5 and 2 mins.



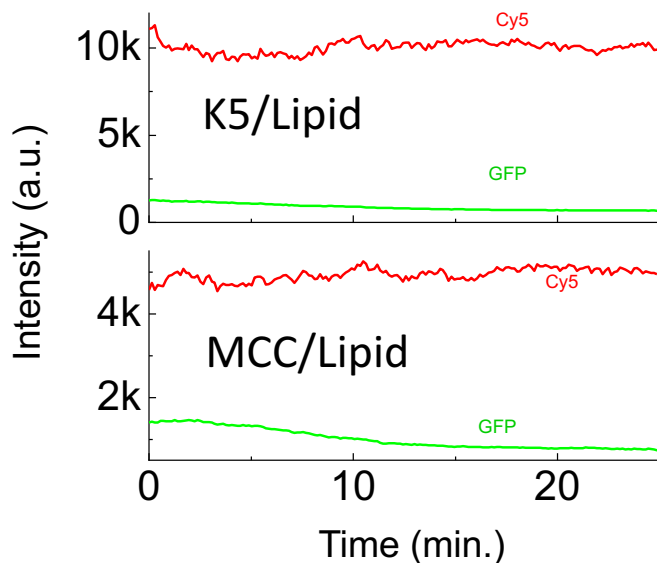

**Extended Data Fig. 13 | Negative controls of transmembrane FRET.** To rule out the possibility that transmembrane FRET in Fig. 3 was caused by different diffusion rates of TCRs and CD3 $\zeta$  into a microcluster due to the ratiometric nature of FRET, we labelled TCRs with Cy5 and CD3 $\zeta$  with GFP (GFP/Cy5 is a non-FRET pair). The GFP was excited by a 470-nm LED light and the Cy5 was excited by a 640-nm LED light sequentially. The mean fluorescence intensities of Cy5 and GFP (and their ratios) stayed constant in a representative microcluster upon TCR-pMHC ligation for K5 and MCC pMHCs. These experiments confirmed that the transmembrane FRET between CD3 $\zeta$ -GFP and TCR-Alexa568 in Fig. 3 were merely due to TCR-CD3 $\zeta$  conformational changes, as well as confirmed that TCR-CD3 $\zeta$  complexes are very stable (also see TCR/CD3 colocalization in Extended data Fig. 10a). The mean fluorescence intensities were recorded in real time upon adding fluorescently labelled T cells to K5 (top panel) or MCC (bottom panel) pMHCs containing lipid bilayer. Shown are representative time trajectories of intensity out of 3 independent experiments for each pMHC.

Note: these experiments were different from those shown in Extended Data Fig. 5B, which only used a single 470-nm LED light to excite GFP.

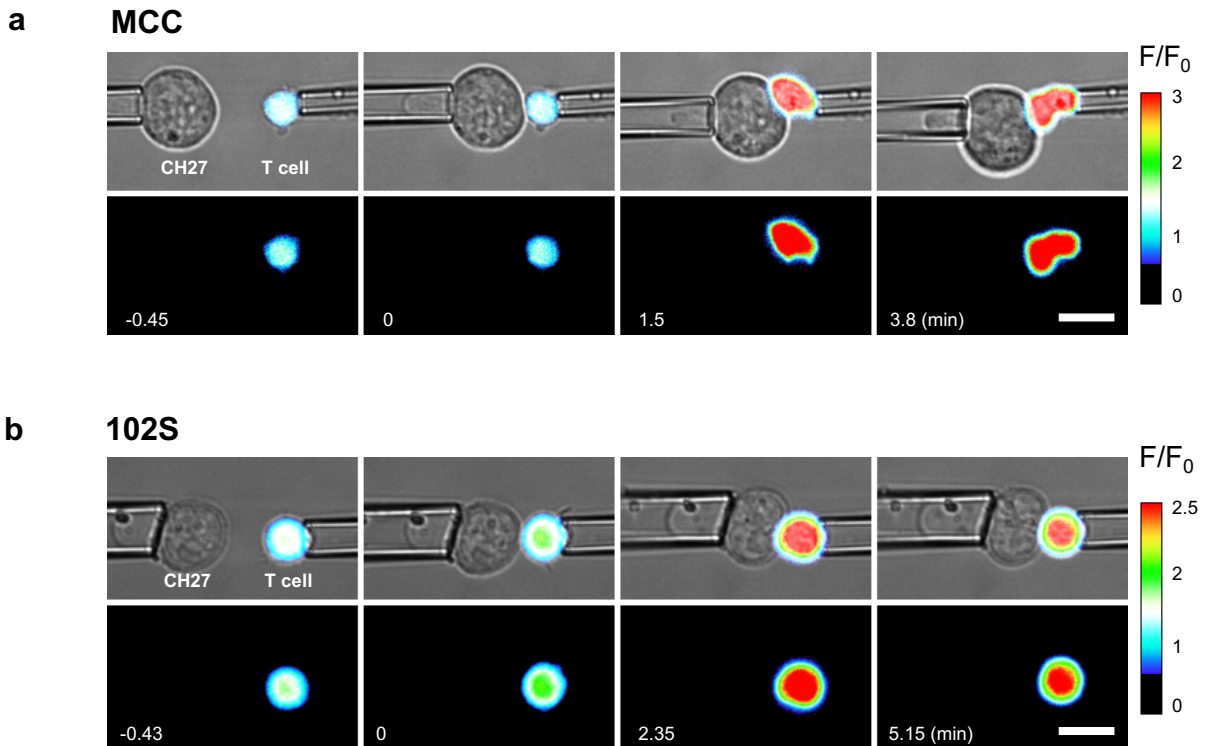

**Extended Data Fig. 14 | Real-time  $\text{Ca}^{2+}$  signaling at the single-cell level.** Calcium imaging of a T cell contacting a CH27 cell loaded with MCC (**a**) or 102S (**b**) peptide measured by fluorescent micropipette at 37 °C. Intracellular high  $\text{Ca}^{2+}$  concentration is indicated by the hot color. Fluorescence signal was recorded by time-lapse fluorescence microscopy (Extended Data Fig. 2b) and the fold-increase of  $\text{Ca}^{2+}$  signaling ( $F/F_0$ ) was shown by pseudo color. Shown are representative experiments out of 3-5 independent experiments for each peptide (MCC and 102S). See Fig. 4e-f for  $\text{Ca}^{2+}$  signaling of T cell activated by K5 and Null peptides. Also see Supplementary Movie 9. Scale bar 10  $\mu\text{m}$ .

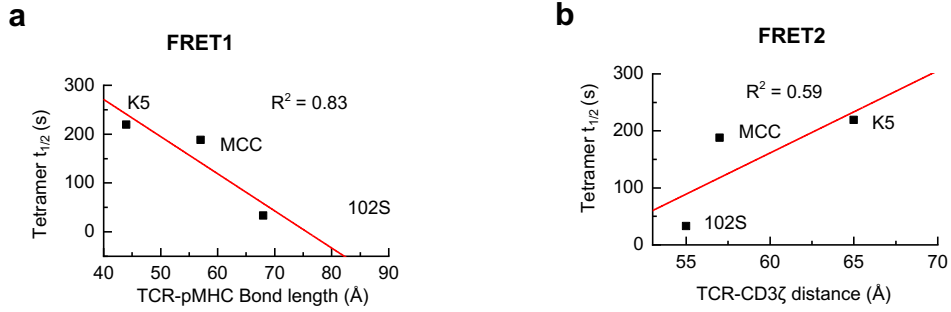

**Extended Data Fig. 15** | Correlation between of the half-lives ( $t_{1/2}$ ) of tetramer staining at 25 °C and intermolecular TCR-pMHC bond length (a) or intramolecular TCR-CD3 $\zeta$  distance (b). The tetramer  $t_{1/2}$  data was adopted from Corse et al. 2010.

**Extended Data Table 1 | 2D kinetic parameters**

|      | $m_r$  | $m_l$   | $A_c K_a \times 10^{-5}$ | $k_r$     | $A_c K_{on} \times 10^{-5}$ |
|------|--------|---------|--------------------------|-----------|-----------------------------|
|      | 118.34 | 55.68   | 32.6±7.8                 | 0.87±0.33 | 28.5±12.4                   |
| K5   | 118.34 | 23.43   | 31.8±10.8                | 1.31±0.94 | 41.5±22.6                   |
|      | 118.34 | 8.59    | 43.8±14.3                | 0.76±0.49 | 33.2±20.8                   |
|      | 107.63 | 139.46  | 7.97±1.7                 | 0.97±0.37 | 7.75±3.40                   |
| MCC  | 107.63 | 30.45   | 22.5±4.4                 | 0.97±0.38 | 21.9±3.39                   |
|      | 107.63 | 14.48   | 14.3±4.4                 | 2.10±1.91 | 29.9±7.44                   |
|      | 118.34 | 1023.01 | 1.10±0.3                 | 1.41±0.76 | 1.55±0.94                   |
| 102S | 118.34 | 224.68  | 2.35±0.6                 | 1.33±0.81 | 3.14±1.03                   |
|      | 118.34 | 120.92  | 1.40±0.5                 | 1.82±1.85 | 2.56±1.67                   |
